# Supplementary material for: Synthesis and reactivity of the apically functionalized (pseudo)macrobicyclic iron(ii) tris-dioximates and their hybrid phthalocyaninatoclathrochelate derivatives comprising reactive and vector terminal groups
Source: Royal Society of Chemistry journal article supplement (doi:10.1039/d2nj01560a), 2022-01-01
Supplement: d2nj01560a1.pdf [file d2nj01560a1.pdf]

Supporting Information

for

**Syntheses and reactivity of the apically functionalized  
(pseudo)macrobicyclic iron(II) tris-dioximates and their hybrid  
phthalocyaninatoclathrochelate derivatives comprising reactive and  
vector terminal group**

Alexander S. Chuprin<sup>a</sup>, Semyon V. Dudkin<sup>a</sup>, Svetlana A. Belova<sup>a,b</sup>,  
Ekaterina G. Lebed<sup>a,b</sup>, Pavel V. Dorovatovskii,<sup>c</sup> Anna V. Vologzhanina<sup>a</sup>,  
Yan Z. Voloshin<sup>a,b</sup>

<sup>a</sup> *Nesmeyanov Institute of Organoelement Compounds of the Russian Academy of  
Sciences, 28 Vavilova st., 119991 Moscow, Russia*

<sup>b</sup> *Kurnakov Institute of General and Inorganic Chemistry of the Russian Academy  
of Sciences, 31 Leninsky pr., 119991 Moscow, Russia*

<sup>c</sup> *National Research Center "Kurchatov Institute", 1 Acad. Kurchatov Sq., 123182  
Moscow, Russian Federation*

<sup>@</sup>*Corresponding author E-mail: voloshin@ineos.ac.ru*

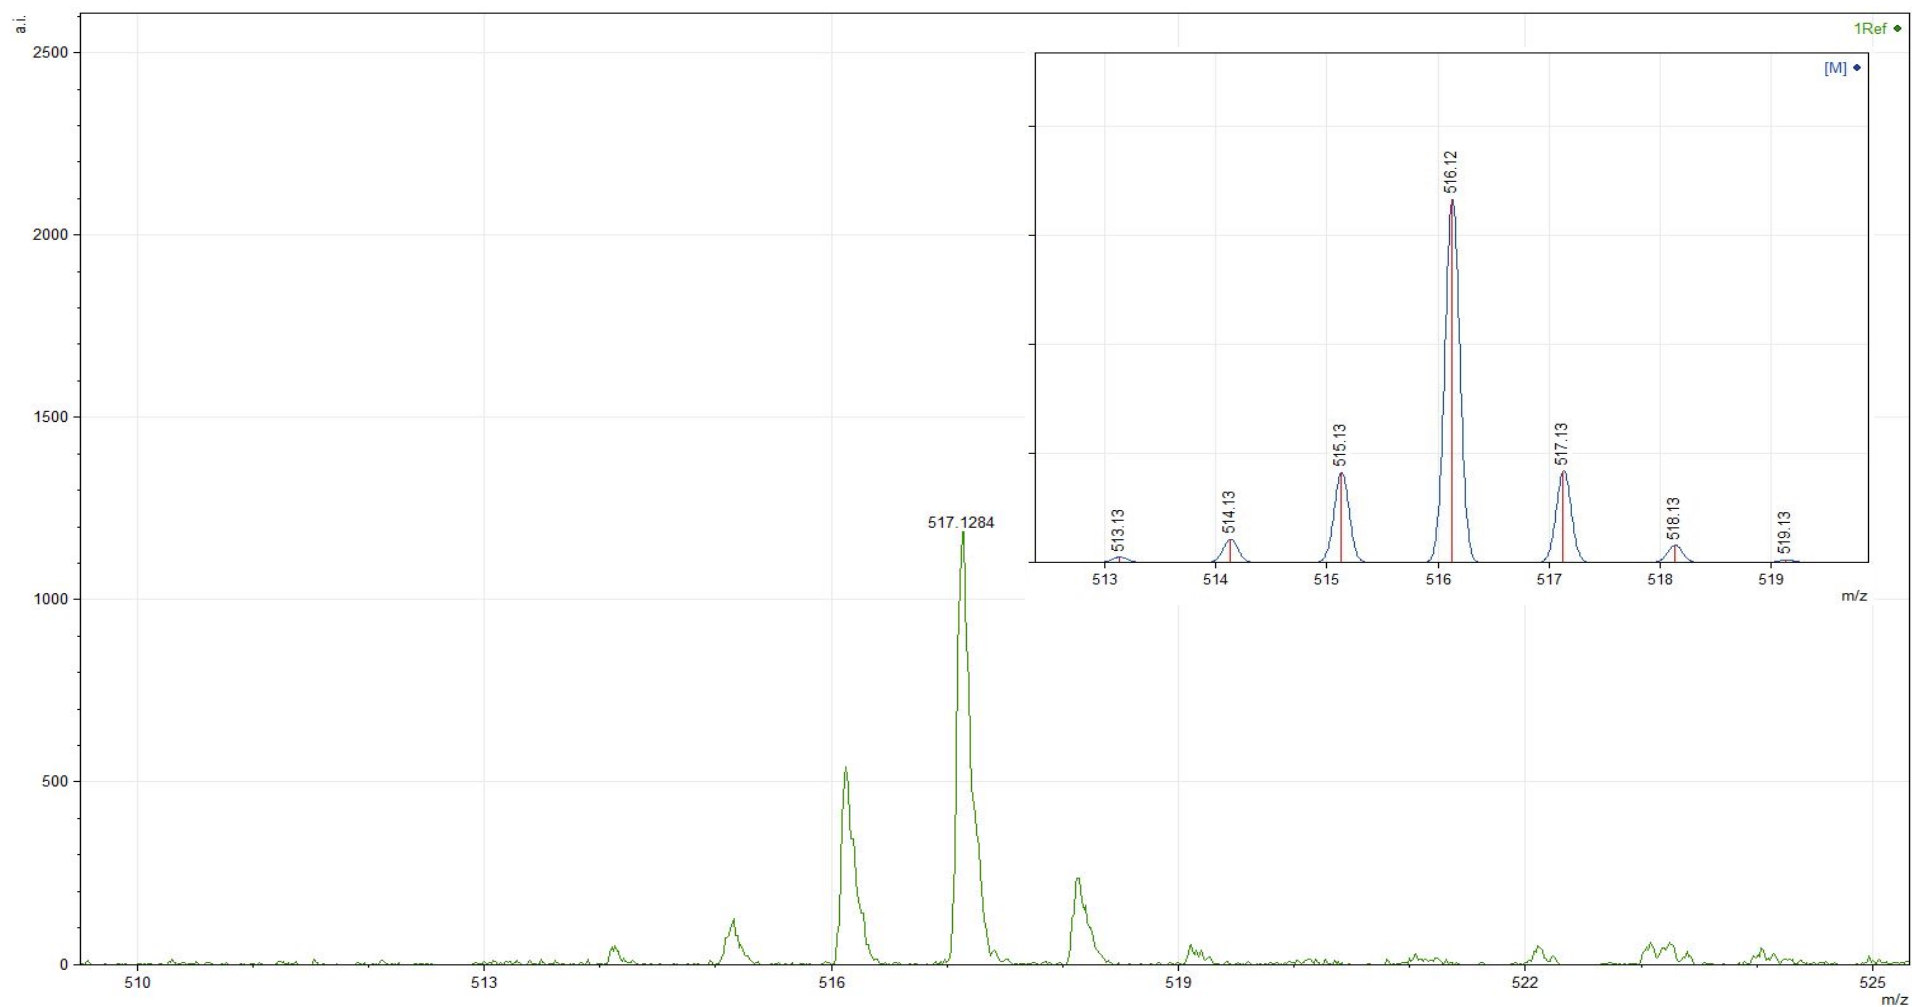

**Fig. S1.** Fragment of the MALDI-TOF mass spectrum of the semiclathrochelate  $\text{FeDm}(\text{HDm})_2(\text{B4-C}_6\text{H}_4\text{CHO})$  in its positive range. Insert: the theoretically calculated isotopic distribution in its molecular ion.

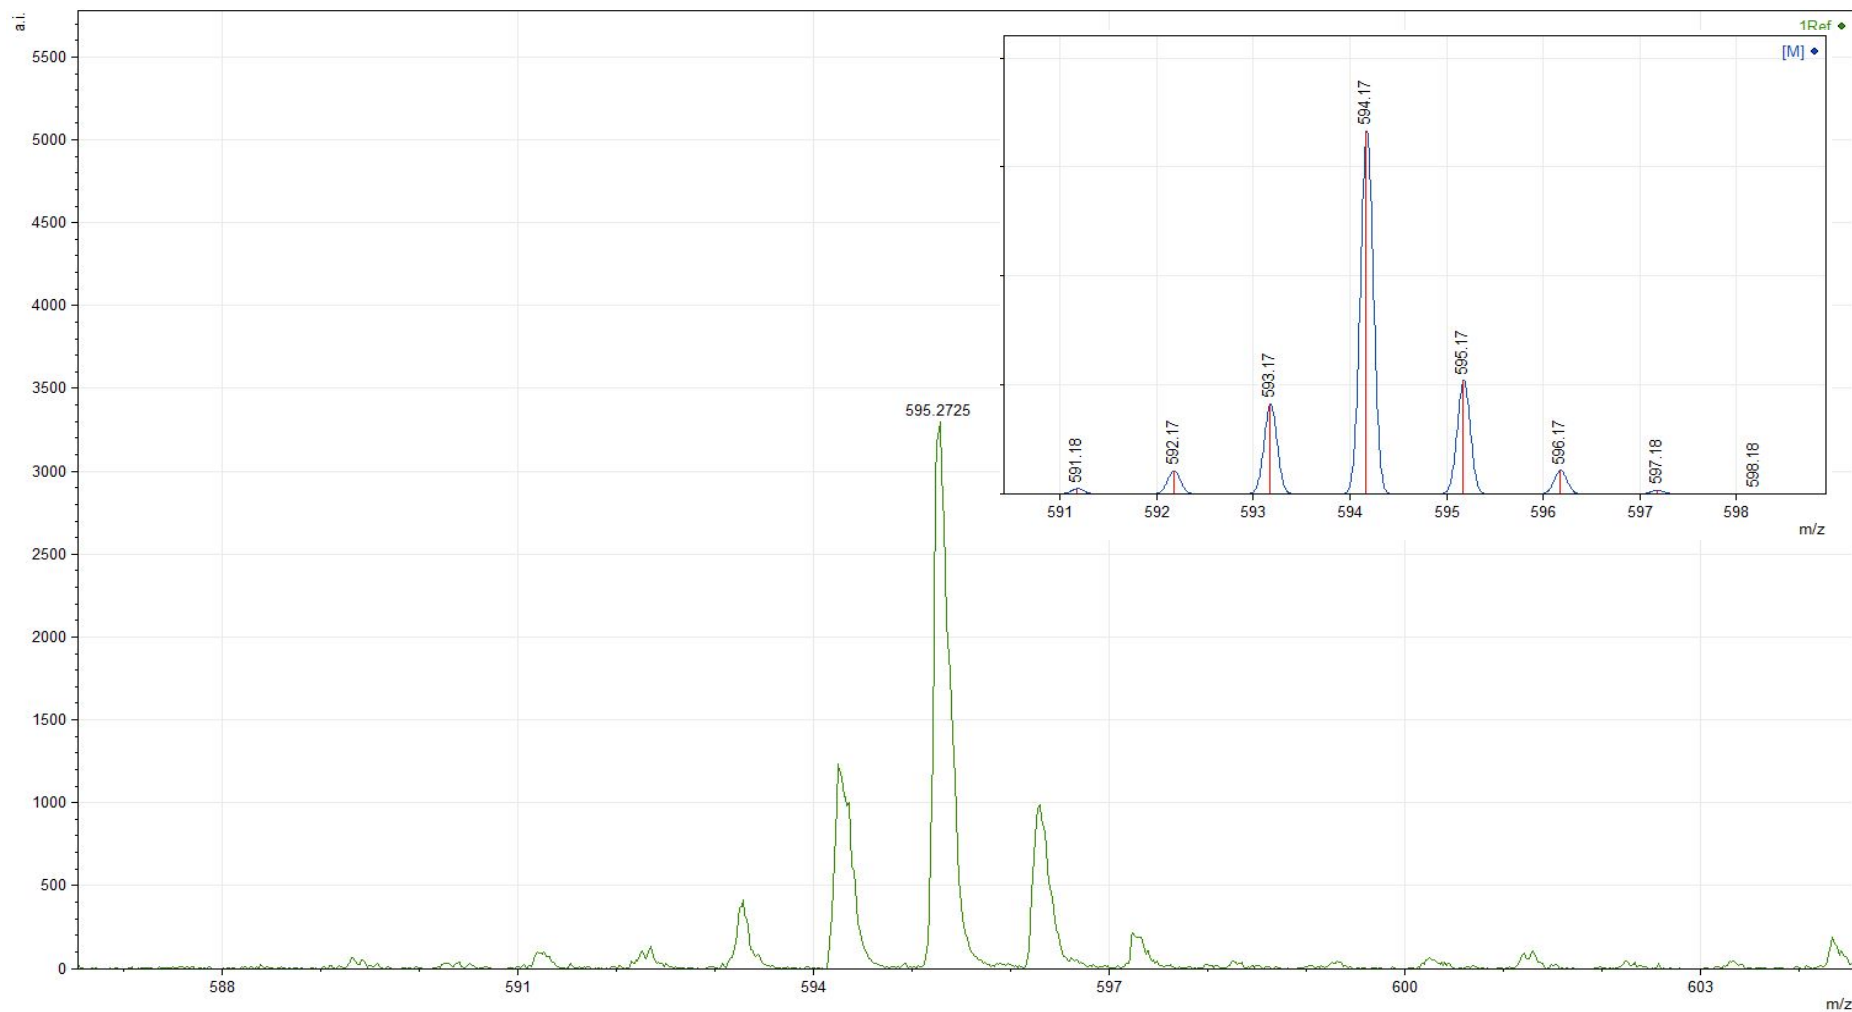

**Fig. S2.** Fragment of the MALDI-TOF mass spectrum of the semiclathrochelate  $\text{FeN}_x(\text{HN}_x)_2(\text{B4-C}_6\text{H}_4\text{CHO})$  in its positive range. Insert: the theoretically calculated isotopic distribution in its molecular ion.

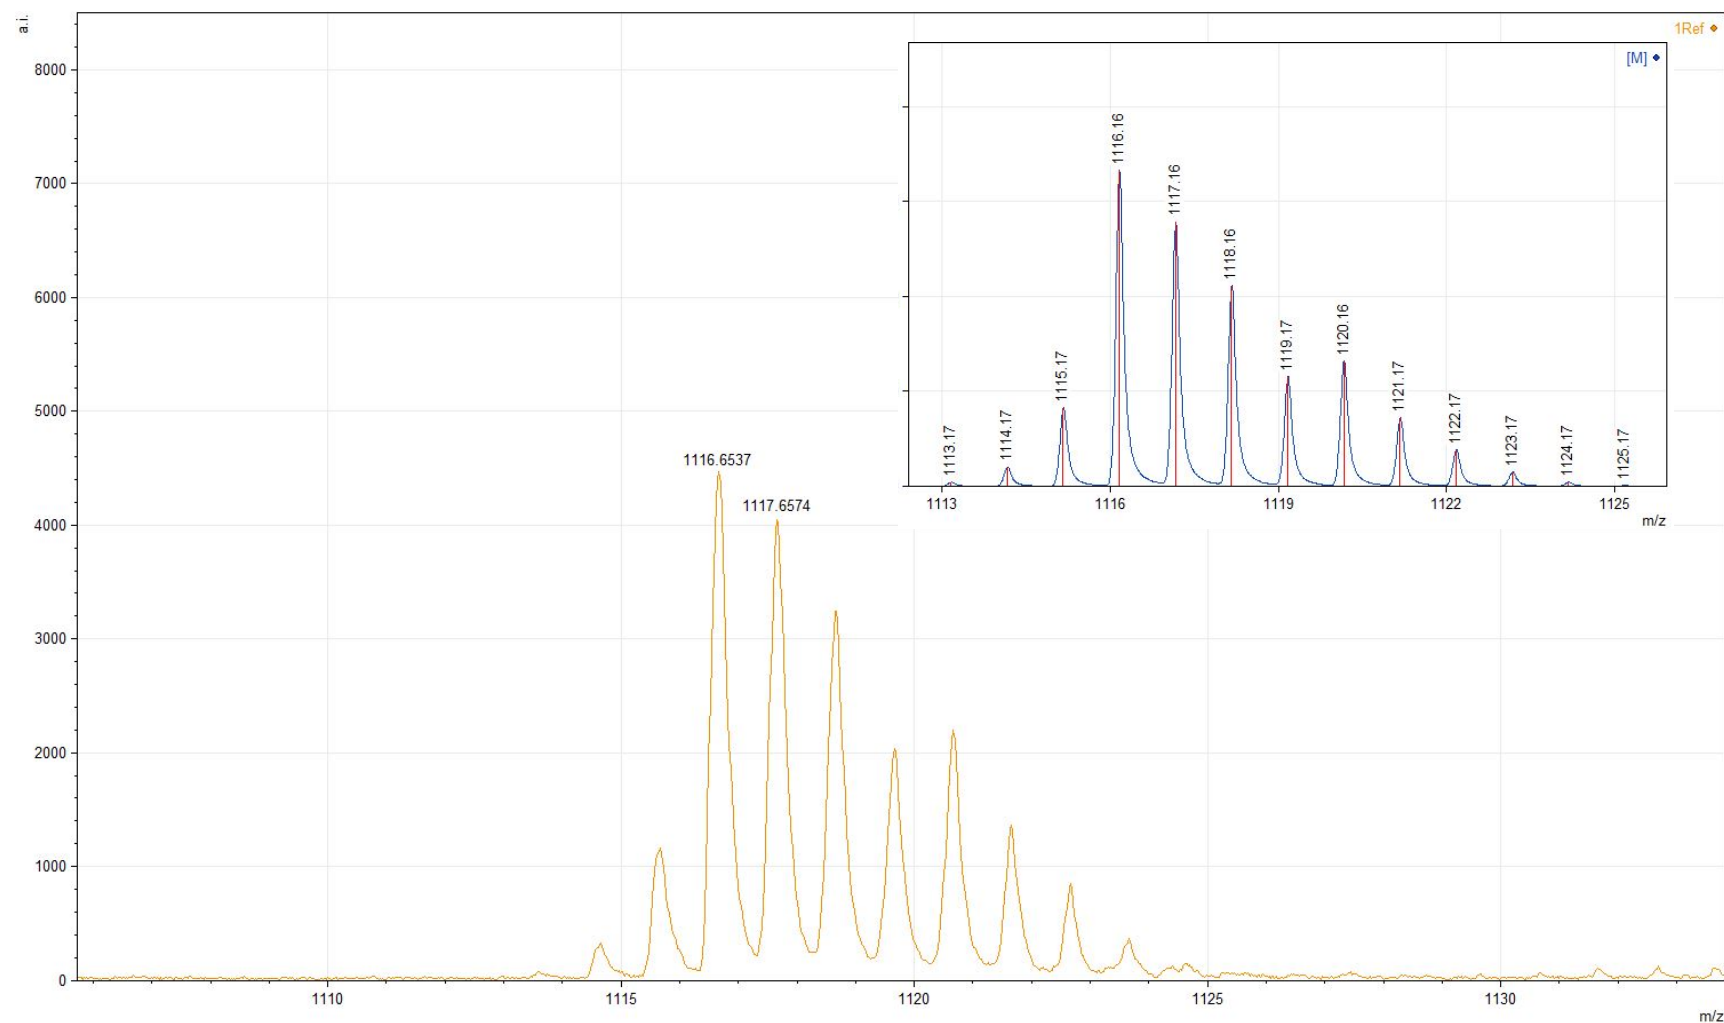

**Fig. S3.** Fragment of the MALDI-TOF mass spectrum of the phthalocyaninatoclathrochelate  $\text{FeDm}_3(\text{B4-C}_6\text{H}_4\text{CHO})(\text{ZrPc})$  in its positive range. Insert: the theoretically calculated isotopic distribution in its molecular ion.

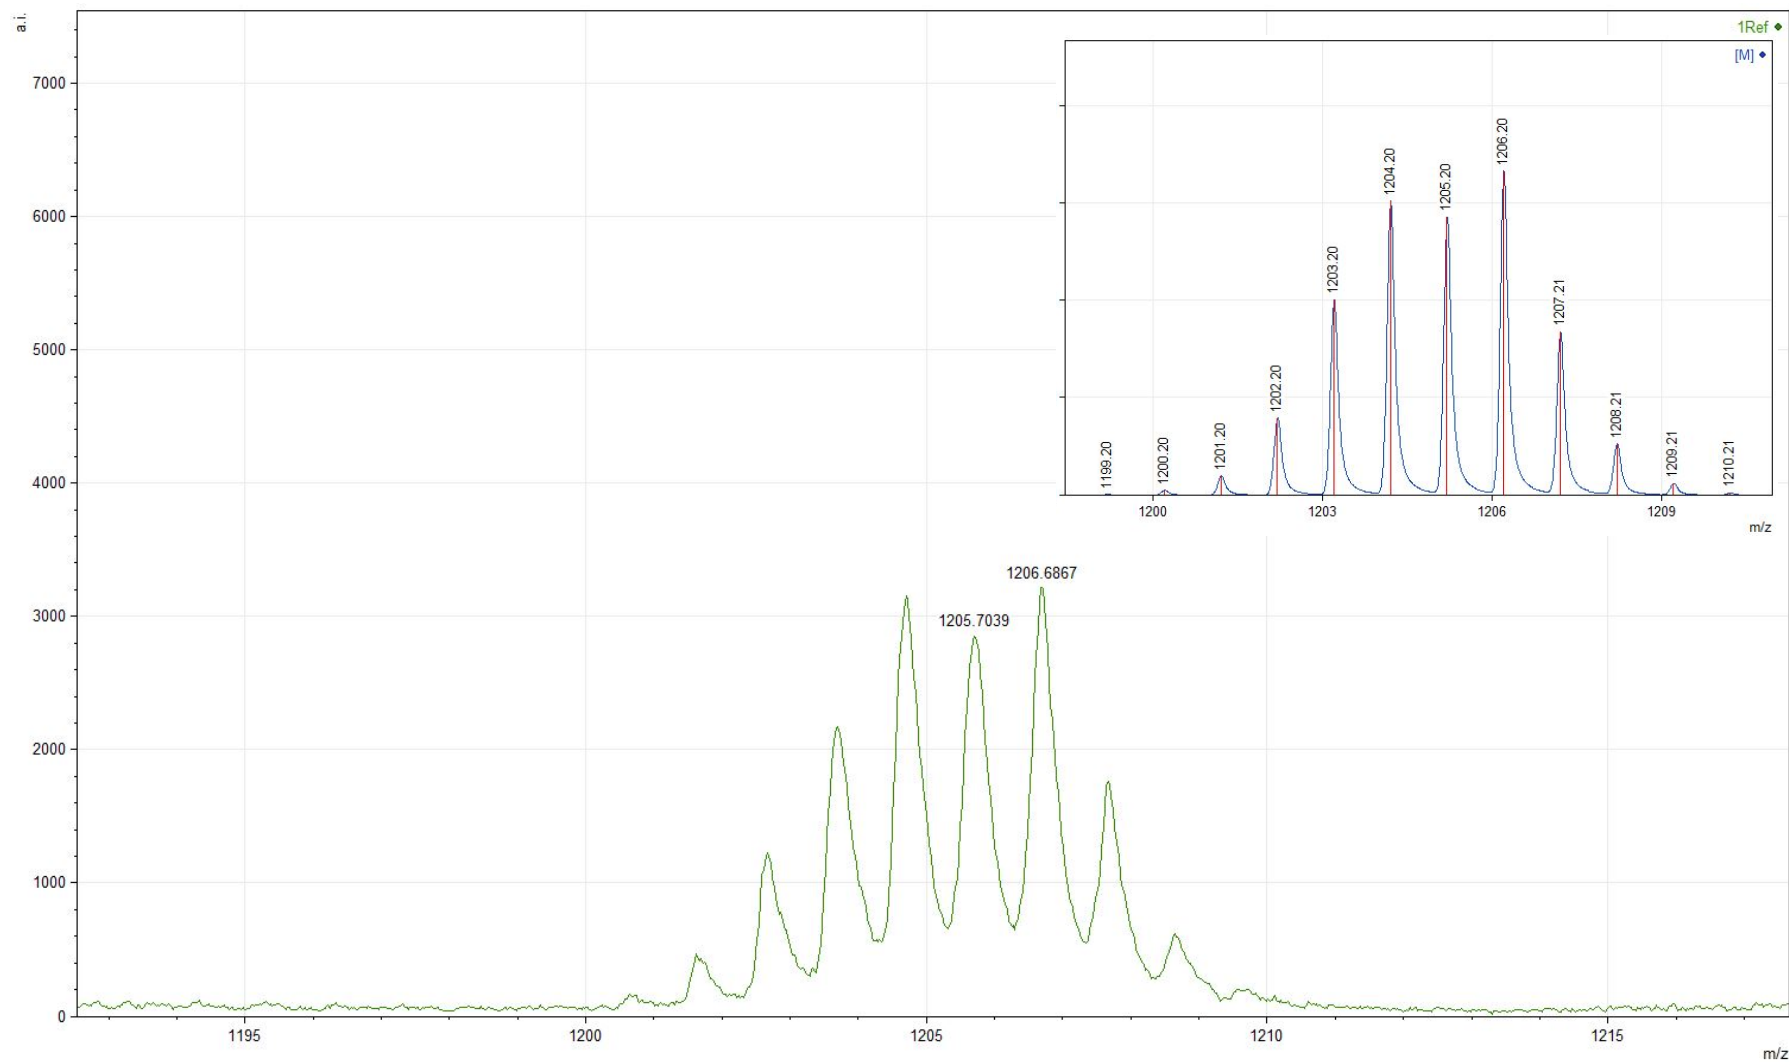

**Fig. S4.** Fragment of the MALDI-TOF mass spectrum of the phthalocyaninatoclathrochelate  $\text{FeDm}_3(\text{B4-C}_6\text{H}_4\text{CHO})(\text{HfPc})$  in its positive range. Insert: the theoretically calculated isotopic distribution in its molecular ion.

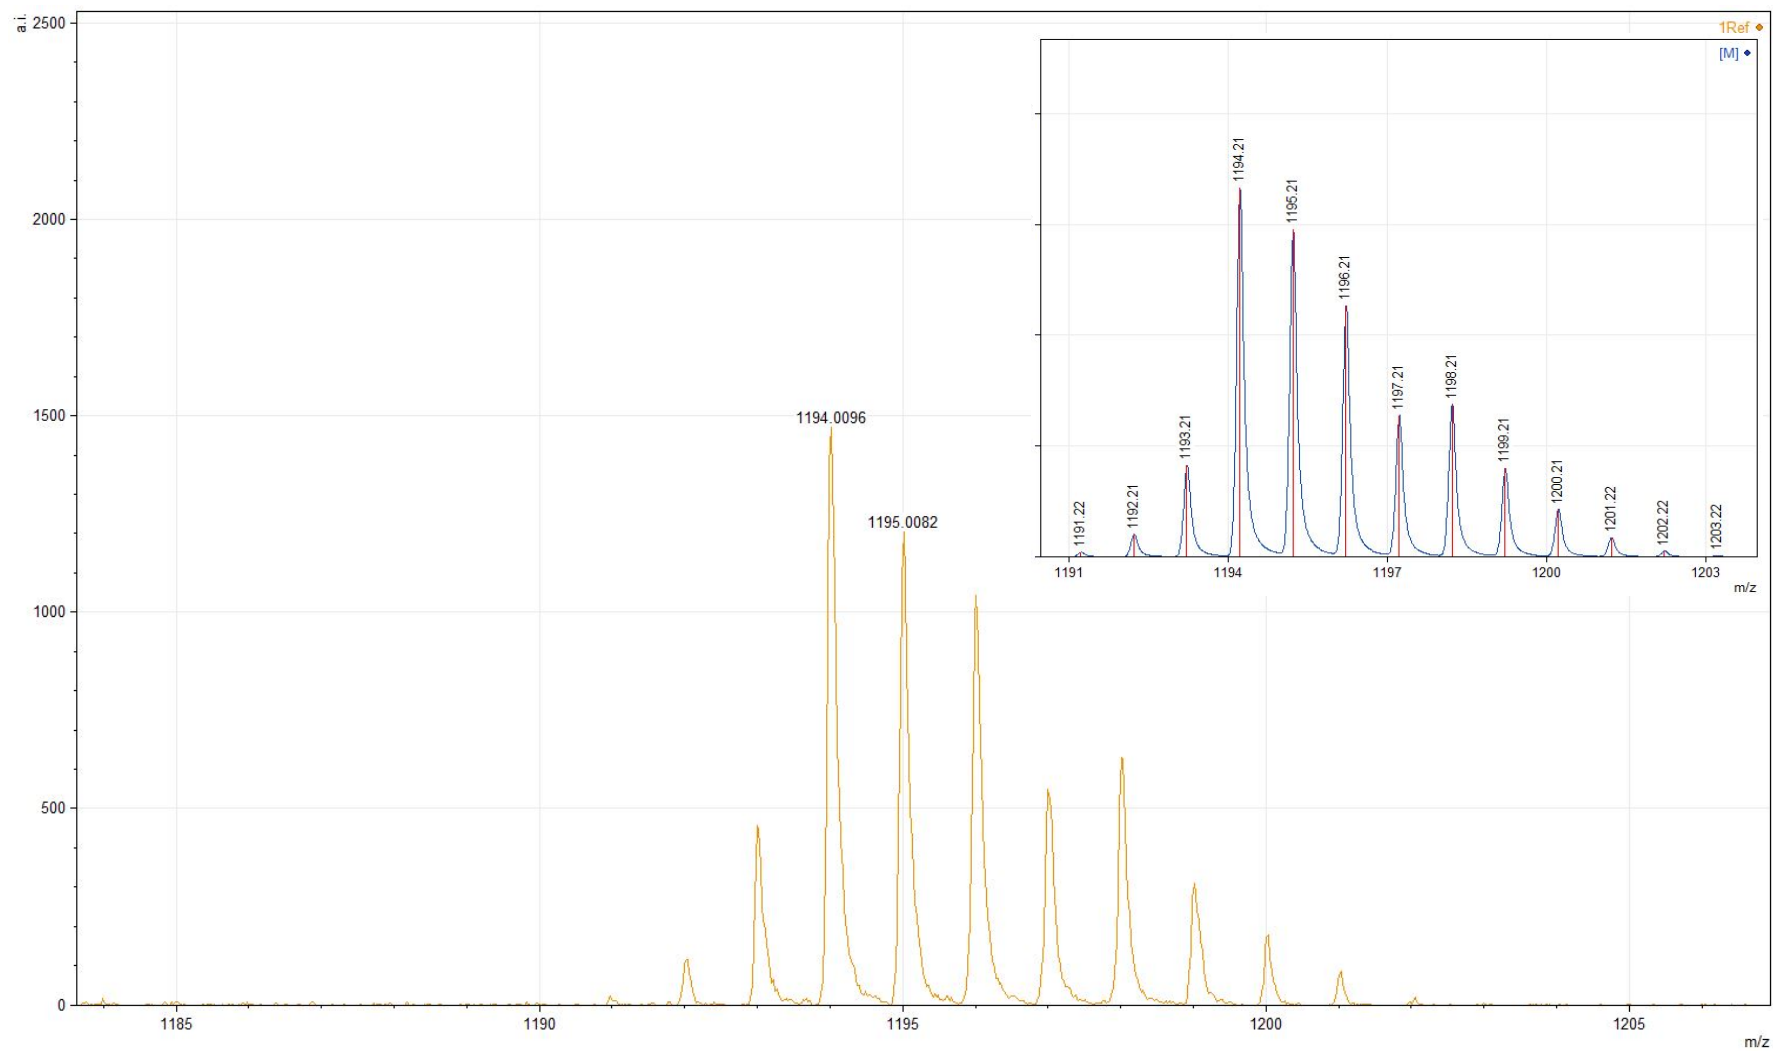

**Fig. S5.** Fragment of the MALDI-TOF mass spectrum of the phthalocyaninatoclathrochelate  $\text{FeN}_x\text{}_3(\text{B4-C}_6\text{H}_4\text{CHO})(\text{ZrPc})$  in its positive range. Insert: the theoretically calculated isotopic distribution in its molecular ion.

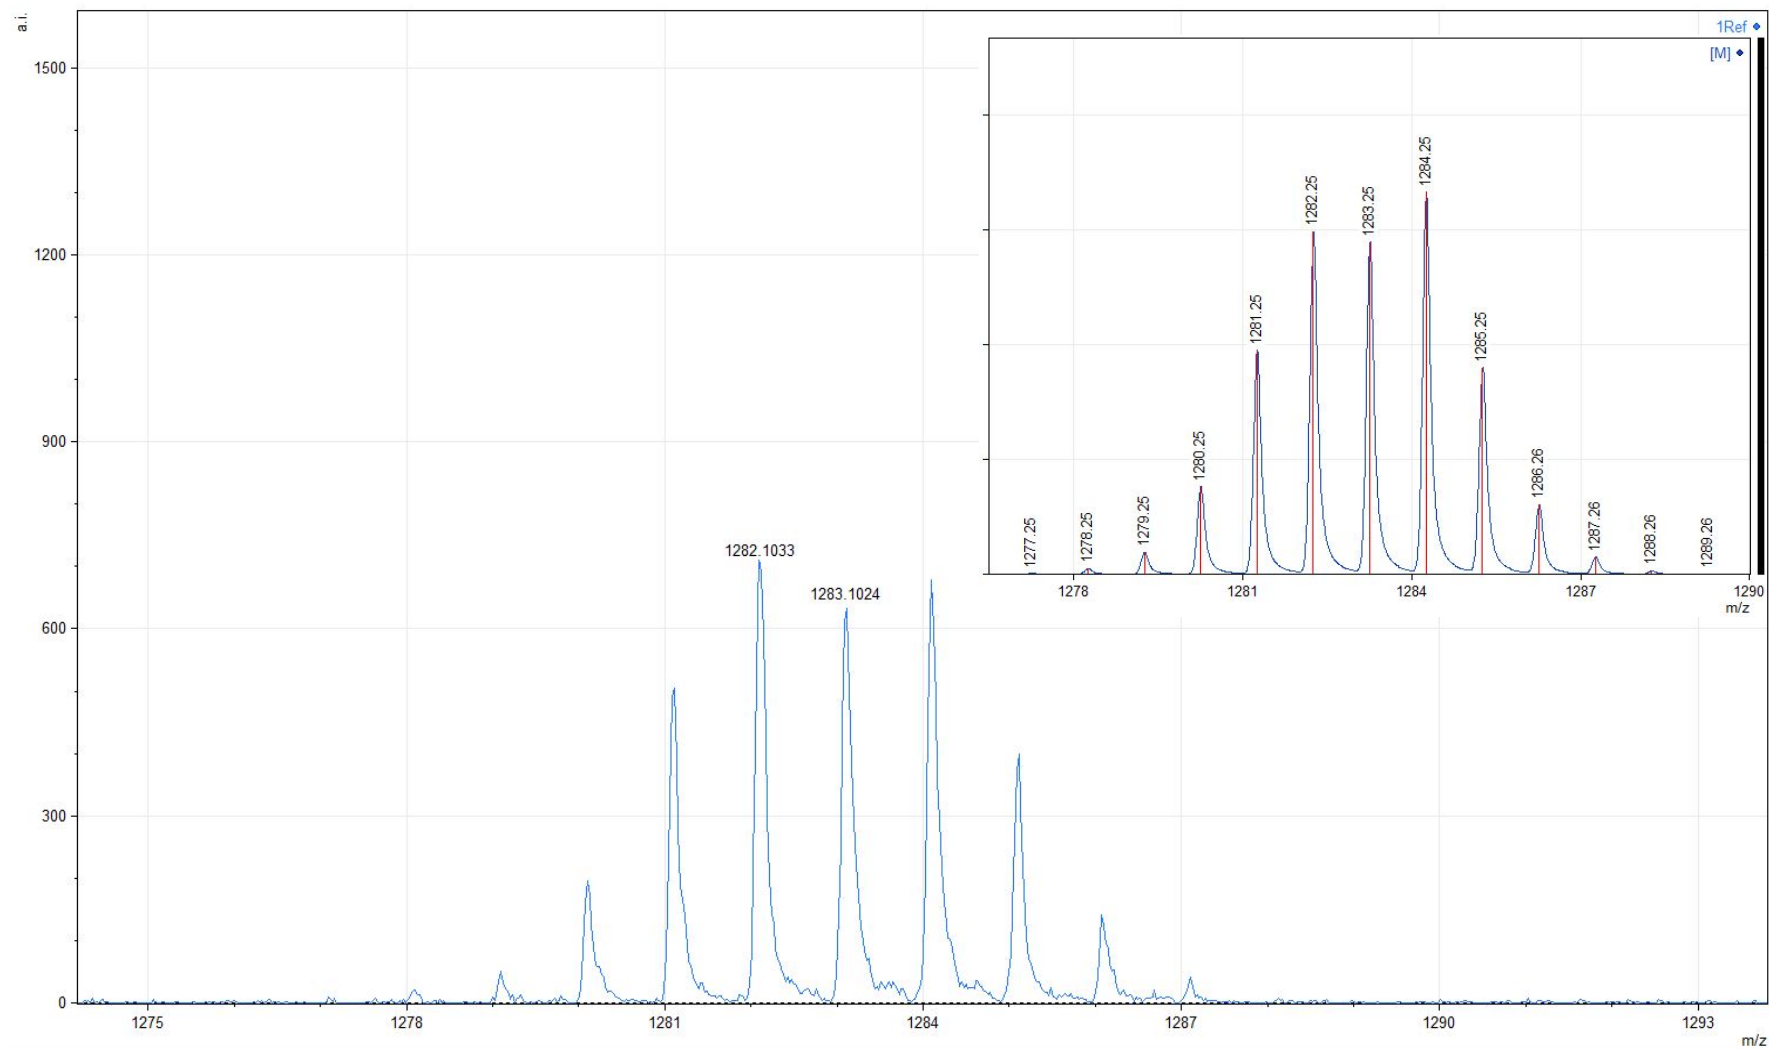

**Fig. S6.** Fragment of the MALDI-TOF mass spectrum of the phthalocyaninatoclathrochelate  $\text{FeN}_x\text{}_3(\text{B4-C}_6\text{H}_4\text{CHO})(\text{HfPc})$  in its positive range. Insert: the theoretically calculated isotopic distribution in its molecular ion.

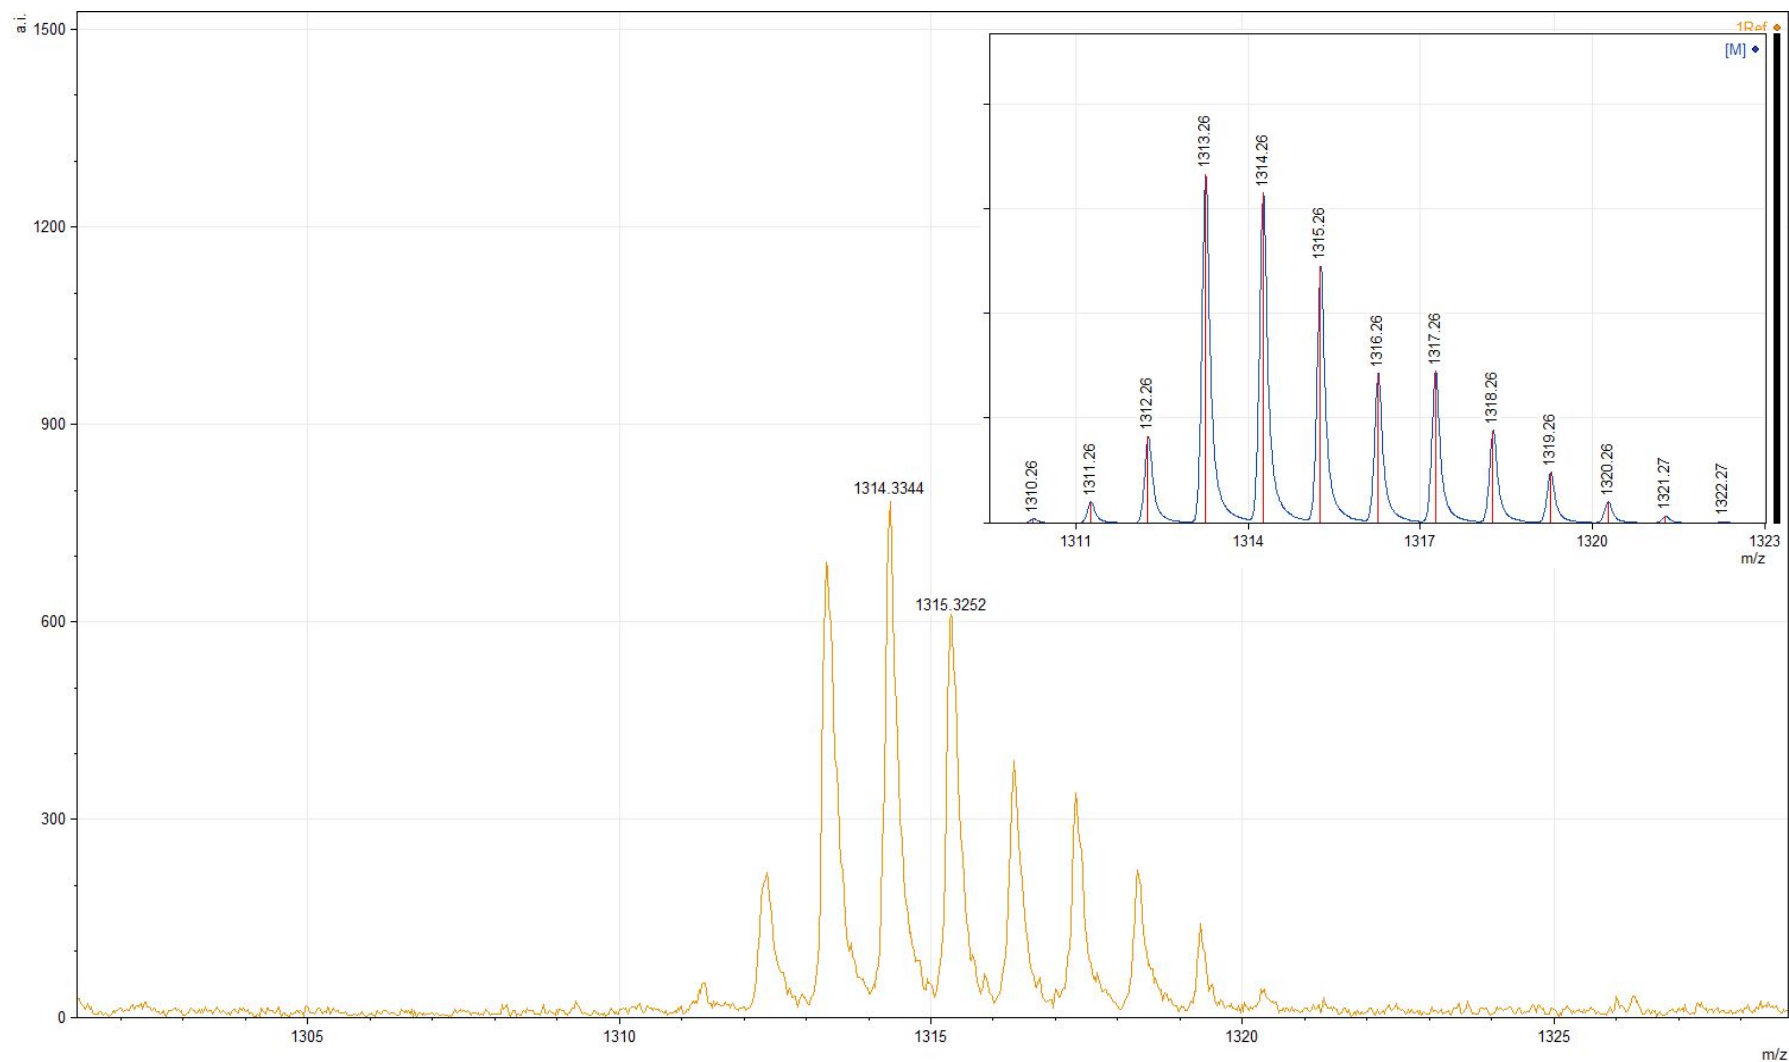

**Fig. S7.** Fragment of the MALDI-TOF mass spectrum of the hybrid phthalocyaninatoclathrochelate  $\text{FeN}_x\text{}_3(\text{B4-C}_6\text{H}_4\text{Id})(\text{ZrPc})$  in its positive range. Insert: the theoretically calculated isotopic distribution in its molecular ion.



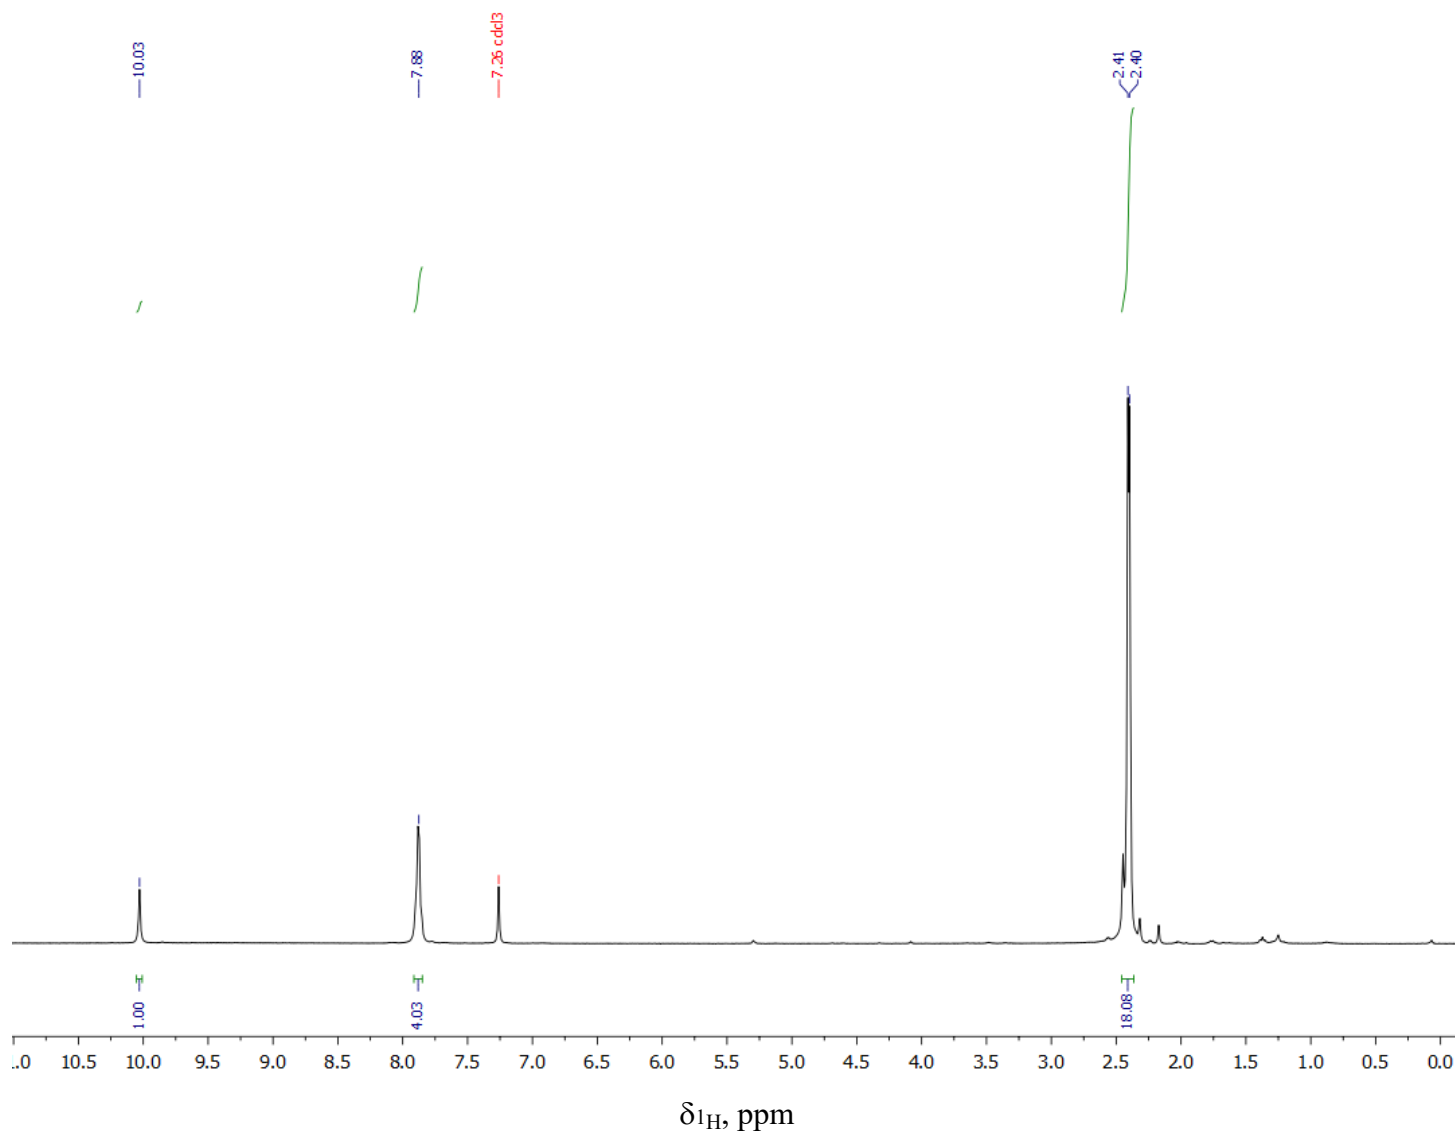

**Fig. S8.**  $^1\text{H}$  NMR spectrum of the semiclathrochelate  $\text{FeDm}(\text{HDm})_2(\text{B4-C}_6\text{H}_4\text{CHO})$  in  $\text{CDCl}_3$ .

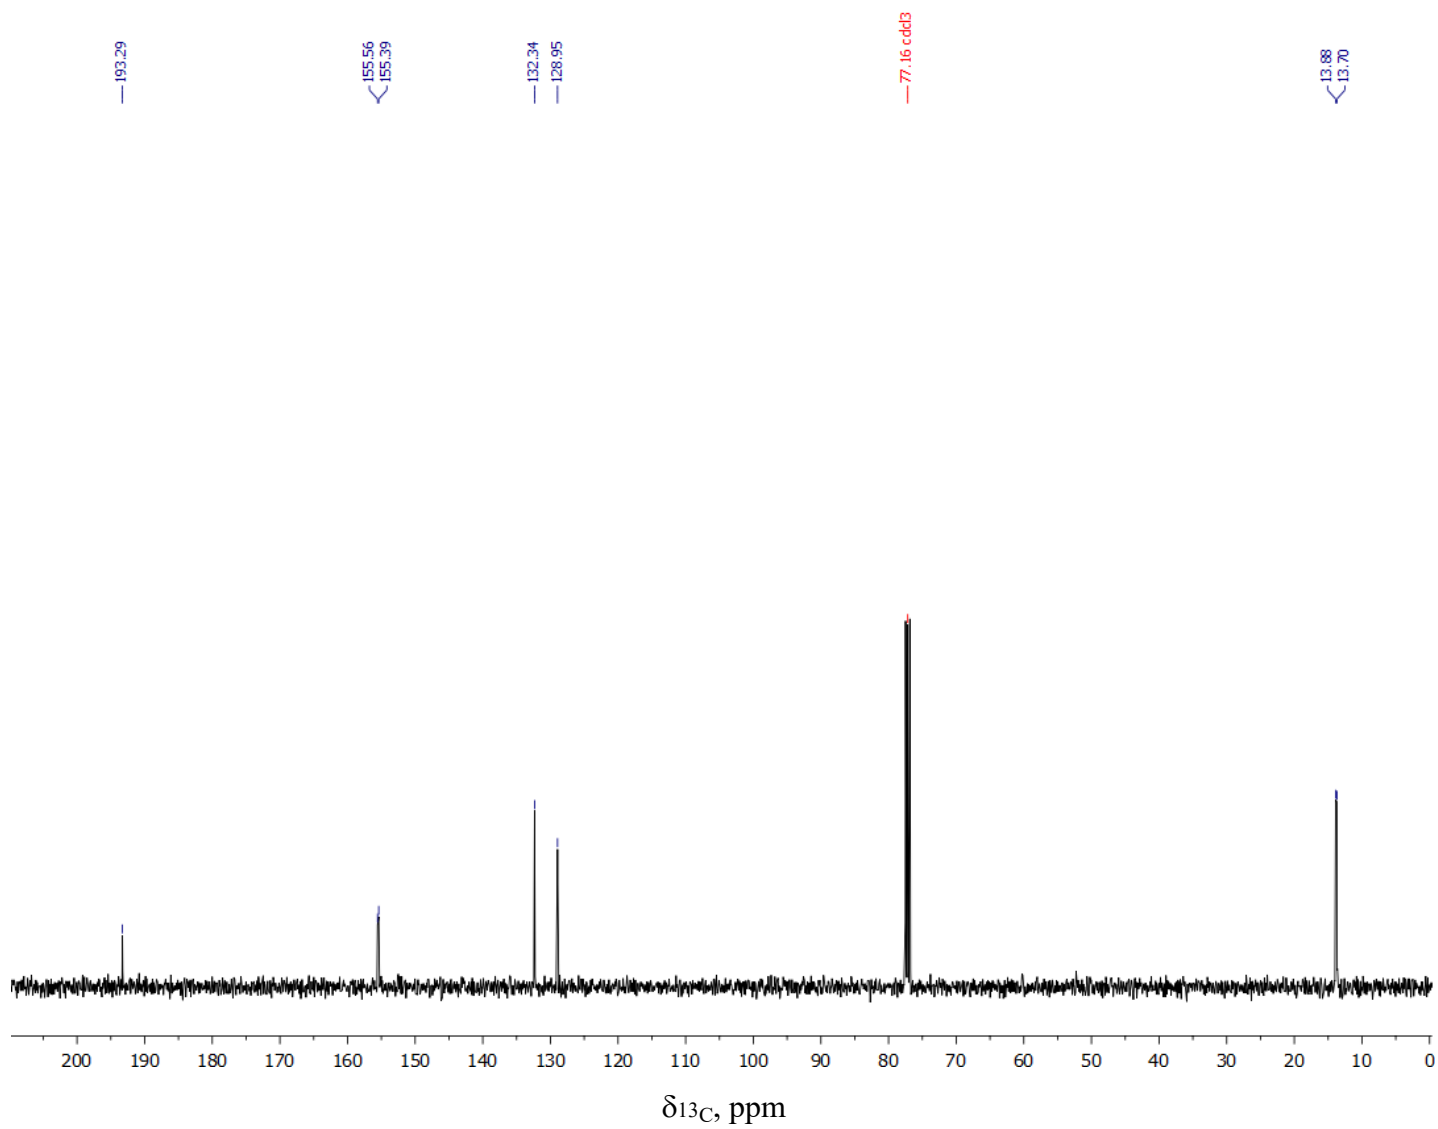

**Fig. S9.**  $^{13}\text{C}\{^1\text{H}\}$  NMR spectrum of the semiclathrochelate  $\text{FeDm}(\text{HDm})_2(\text{B4-C}_6\text{H}_4\text{CHO})$  in  $\text{CDCl}_3$ .

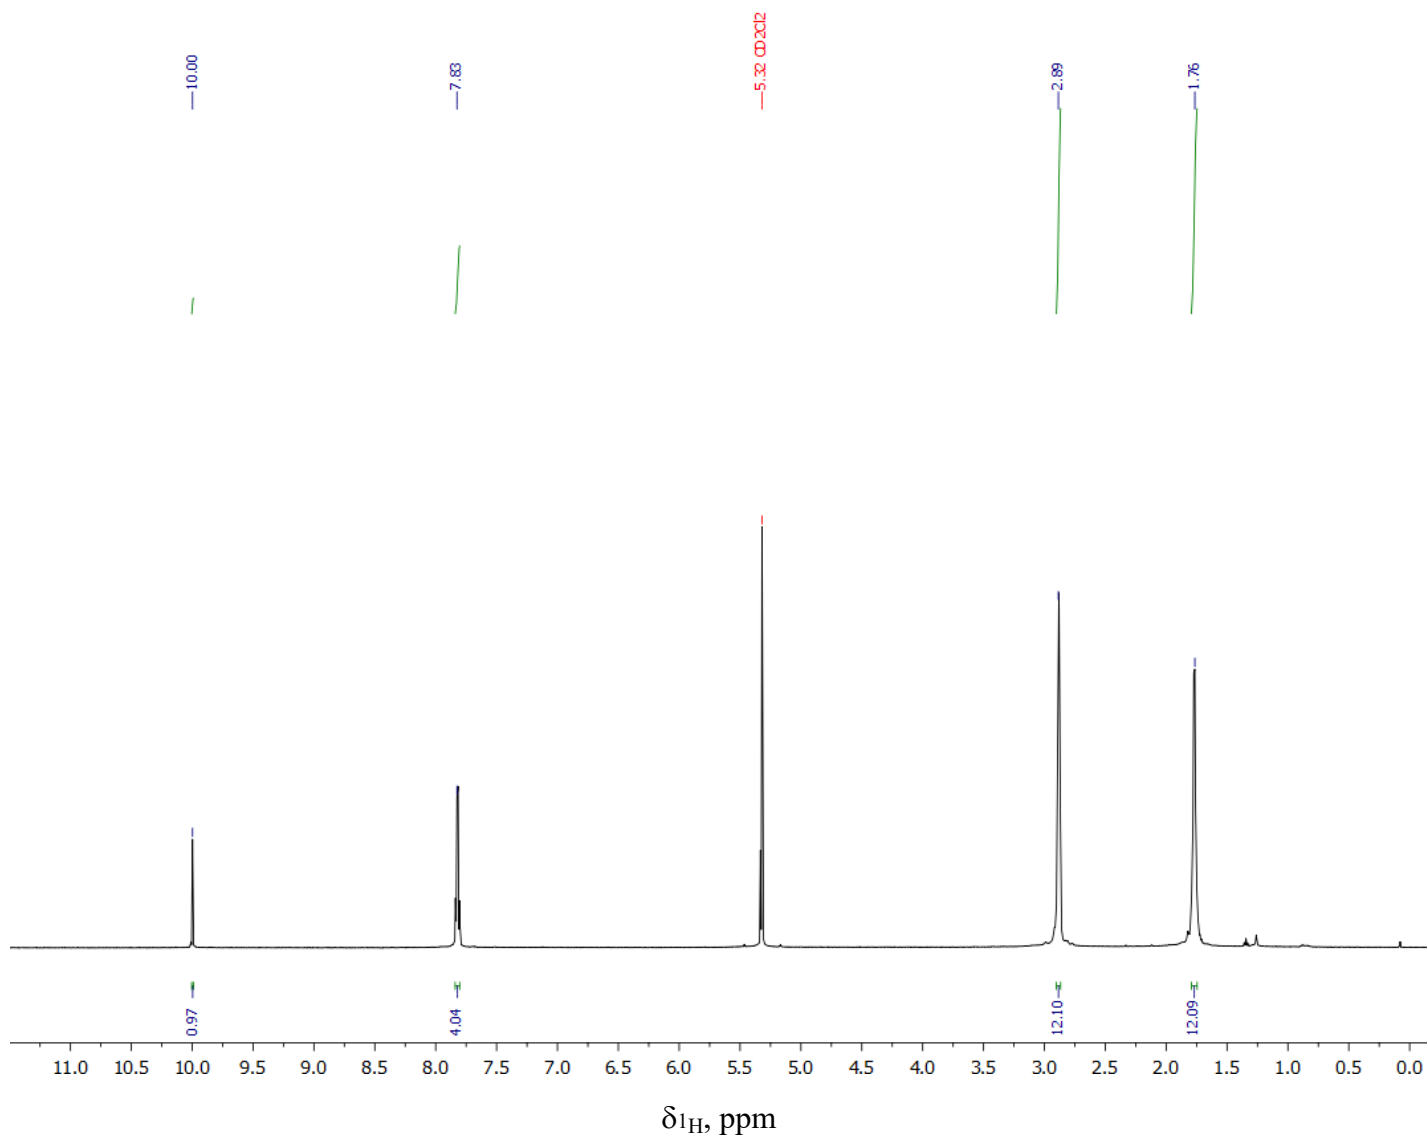

**Fig. S10.**  $^1\text{H}$  NMR spectrum of the semiclathrochelate  $\text{FeN}_x(\text{HN}_x)_2(\text{B4-C}_6\text{H}_4\text{CHO})$  in  $\text{CD}_2\text{Cl}_2$ .

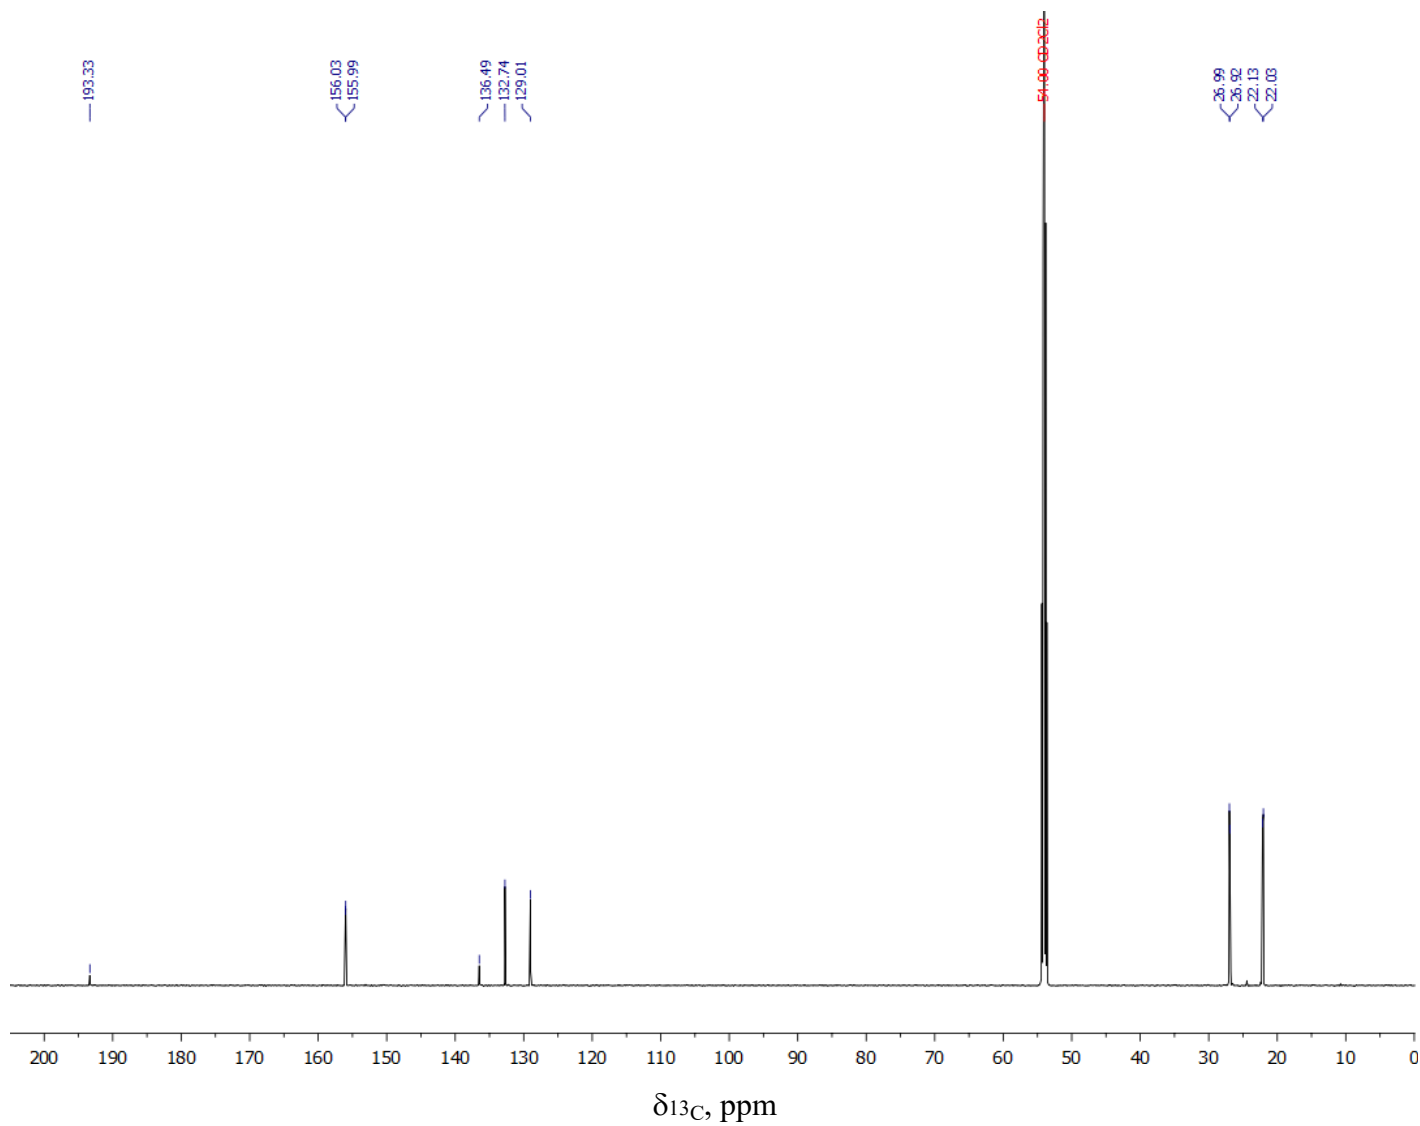

**Fig. S11.**  $^{13}\text{C}\{^1\text{H}\}$  NMR spectrum of the semiclatrocholate  $\text{FeN}_x(\text{HN}_x)_2(\text{B4-C}_6\text{H}_4\text{CHO})$  in  $\text{CD}_2\text{Cl}_2$ .

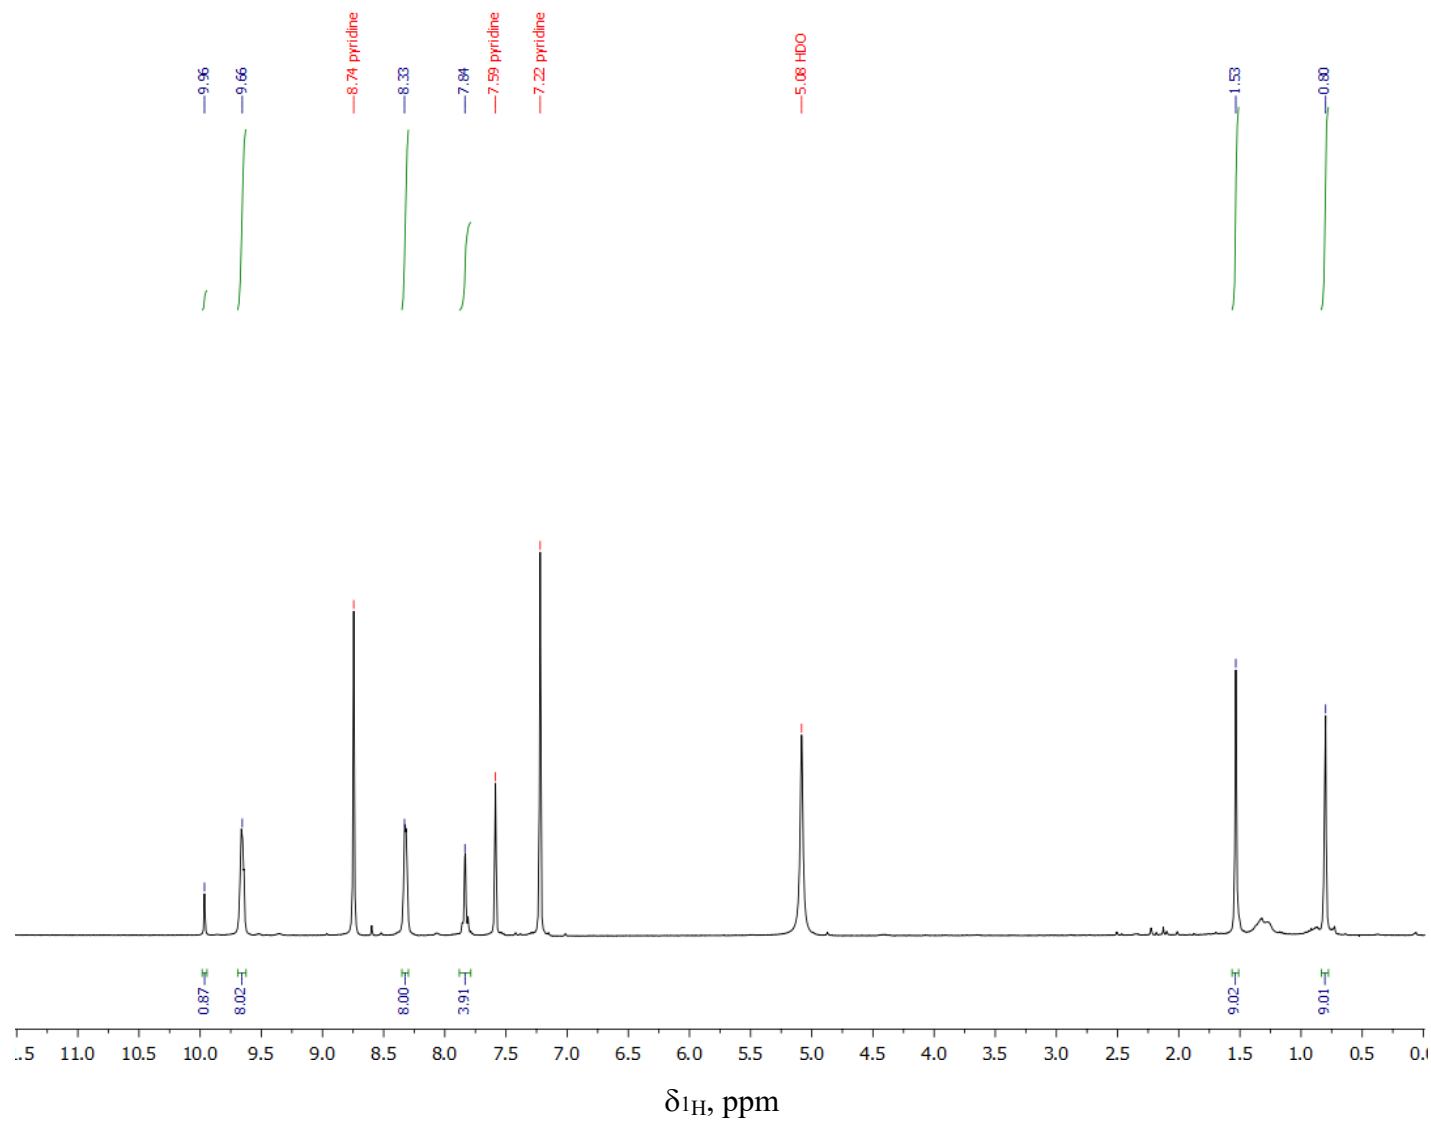

**Fig. S12.**  $^1\text{H}$  NMR spectrum of the phthalocyaninatoclathrochelate  $\text{FeDm}_3(\text{B4-C}_6\text{H}_4\text{CHO})(\text{ZrPc})$  in  $\text{pyridine-}d_5$ .

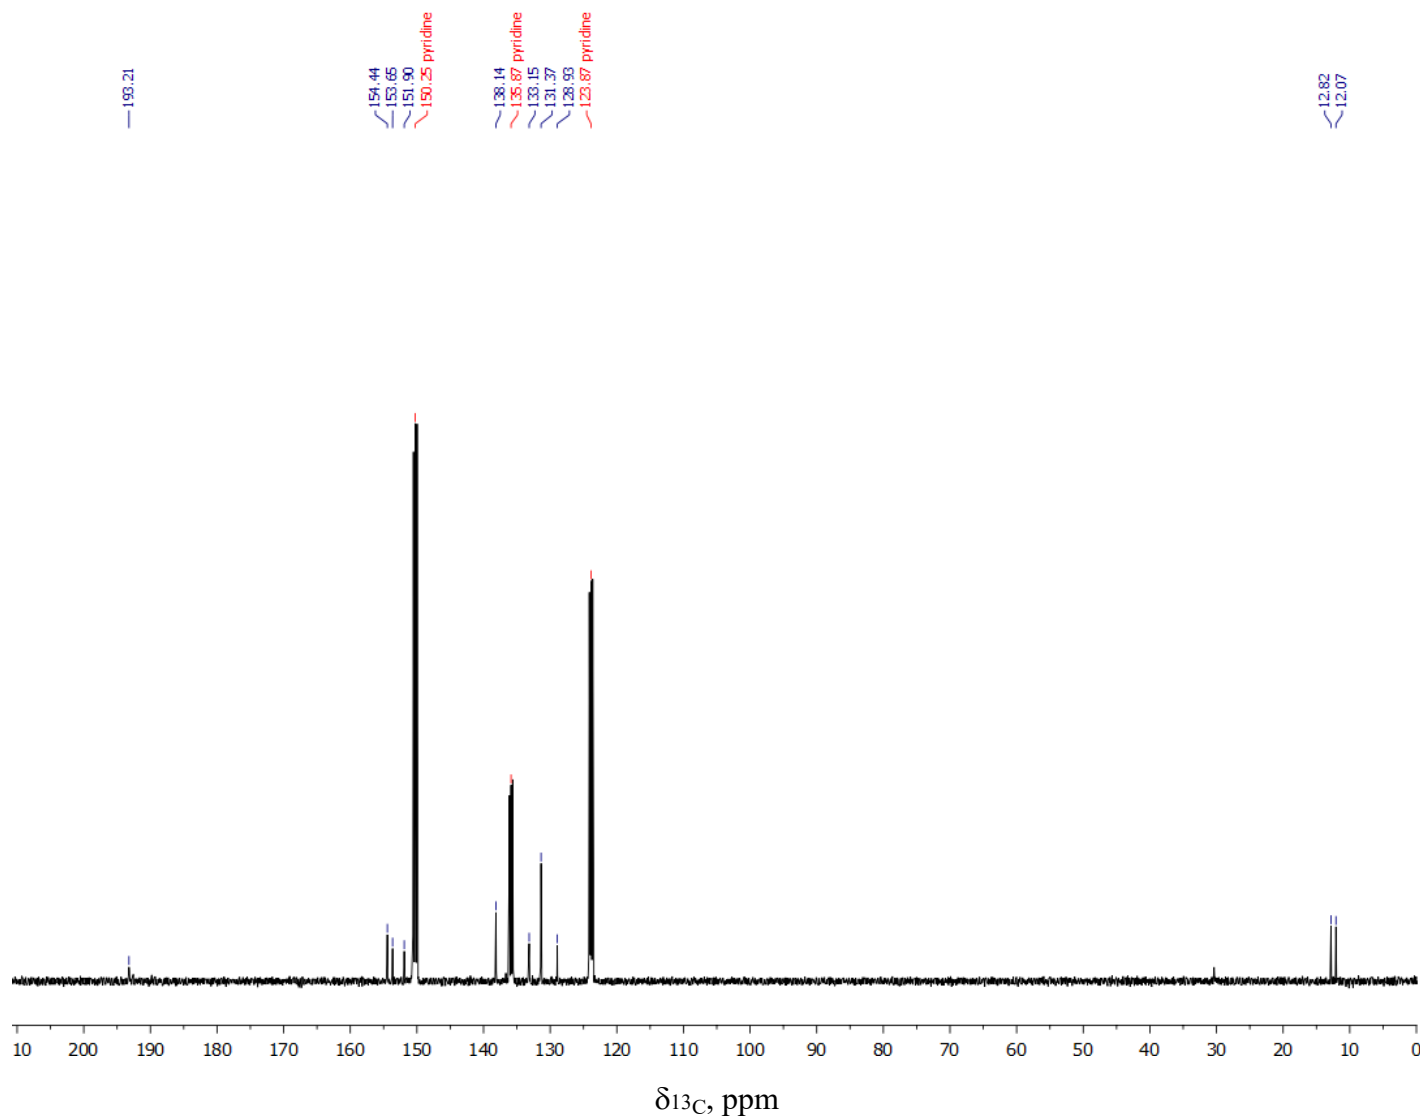

**Fig. S13.**  $^{13}\text{C}\{^1\text{H}\}$  NMR spectrum of the phthalocyaninatoclathrochelate  $\text{FeDm}_3(\text{B4-C}_6\text{H}_4\text{CHO})(\text{ZrPc})$  in pyridine- $d_5$ .

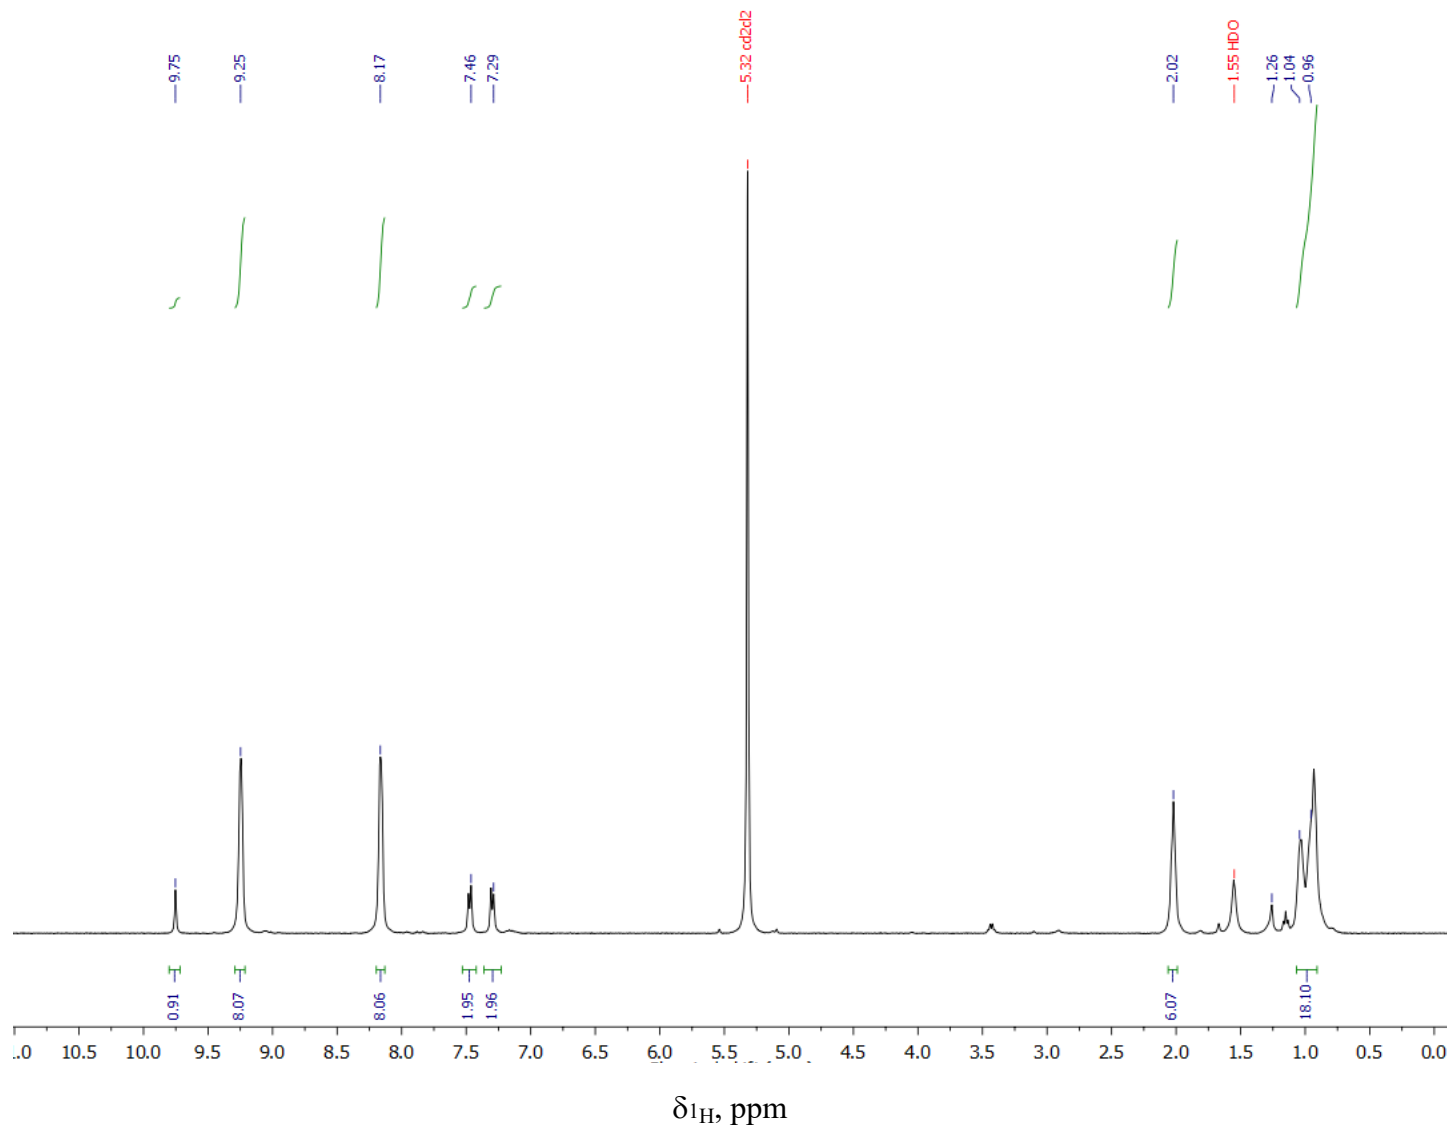

**Fig. S14.**  $^1\text{H}$  NMR spectrum of the phthalocyaninatoclathrochelate  $\text{FeN}_x\text{}_3(\text{B4-C}_6\text{H}_4\text{CHO})(\text{ZrPc})$  in  $\text{CD}_2\text{Cl}_2$ .

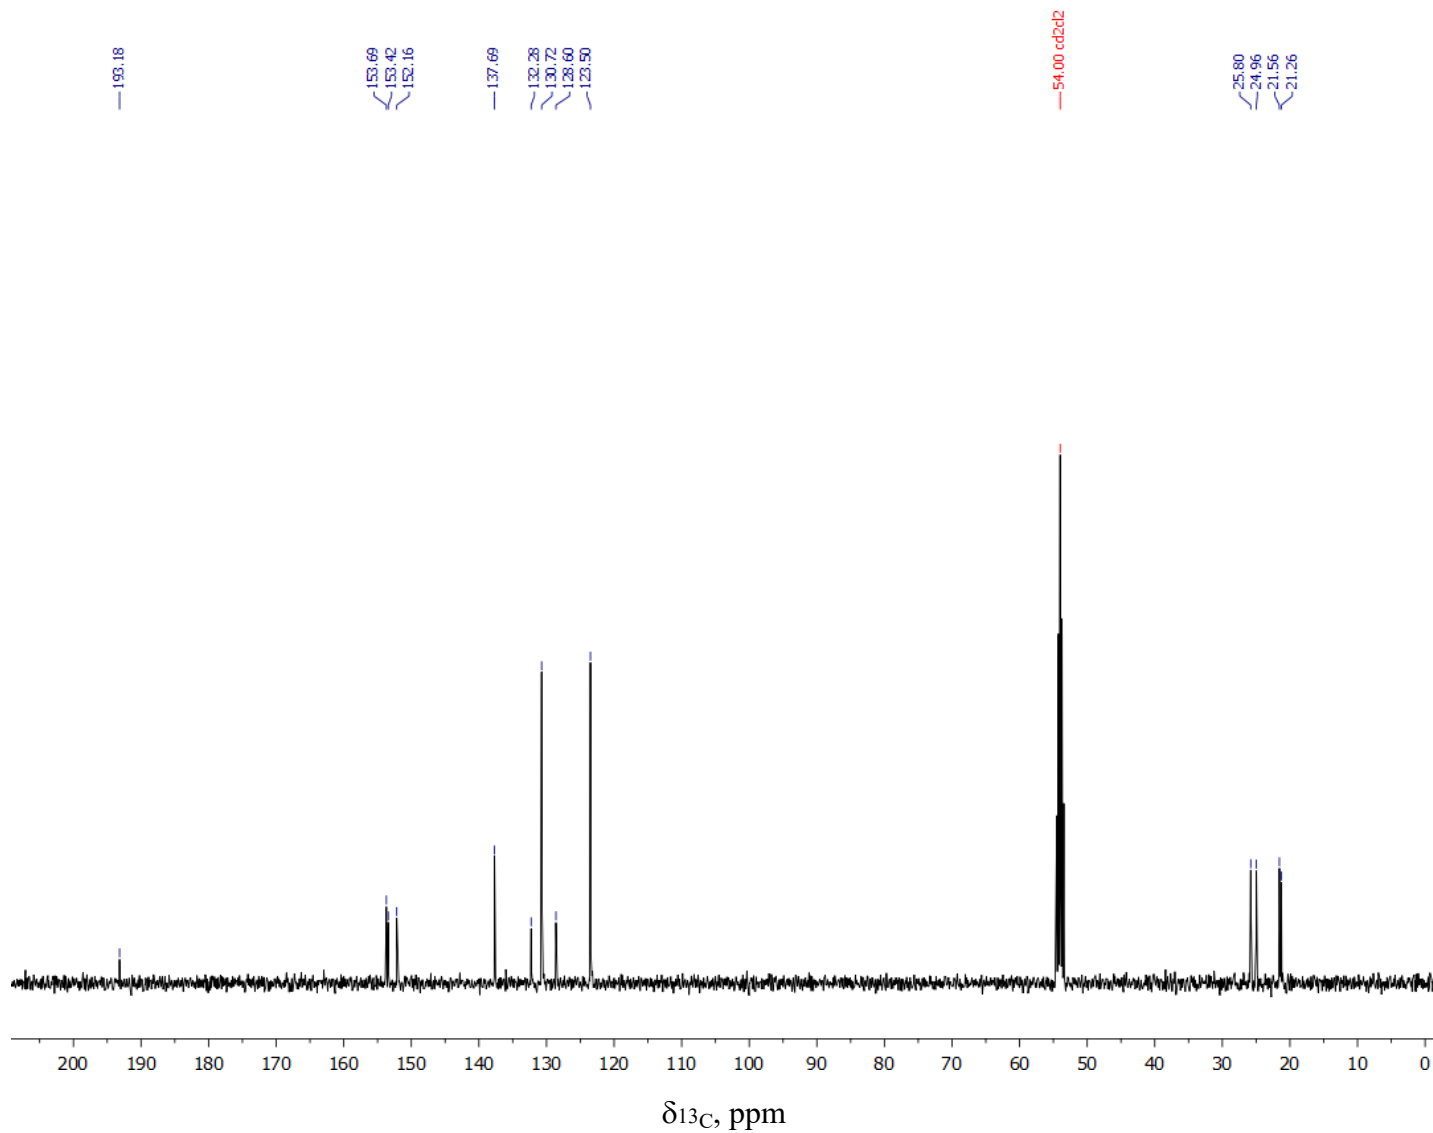

**Fig. S15.**  $^{13}\text{C}\{^1\text{H}\}$  NMR spectrum of the phthalocyaninatoclathrochelate  $\text{FeN}_x\text{}_3(\text{B4-C}_6\text{H}_4\text{CHO})(\text{ZrPc})$  in  $\text{CD}_2\text{Cl}_2$ .



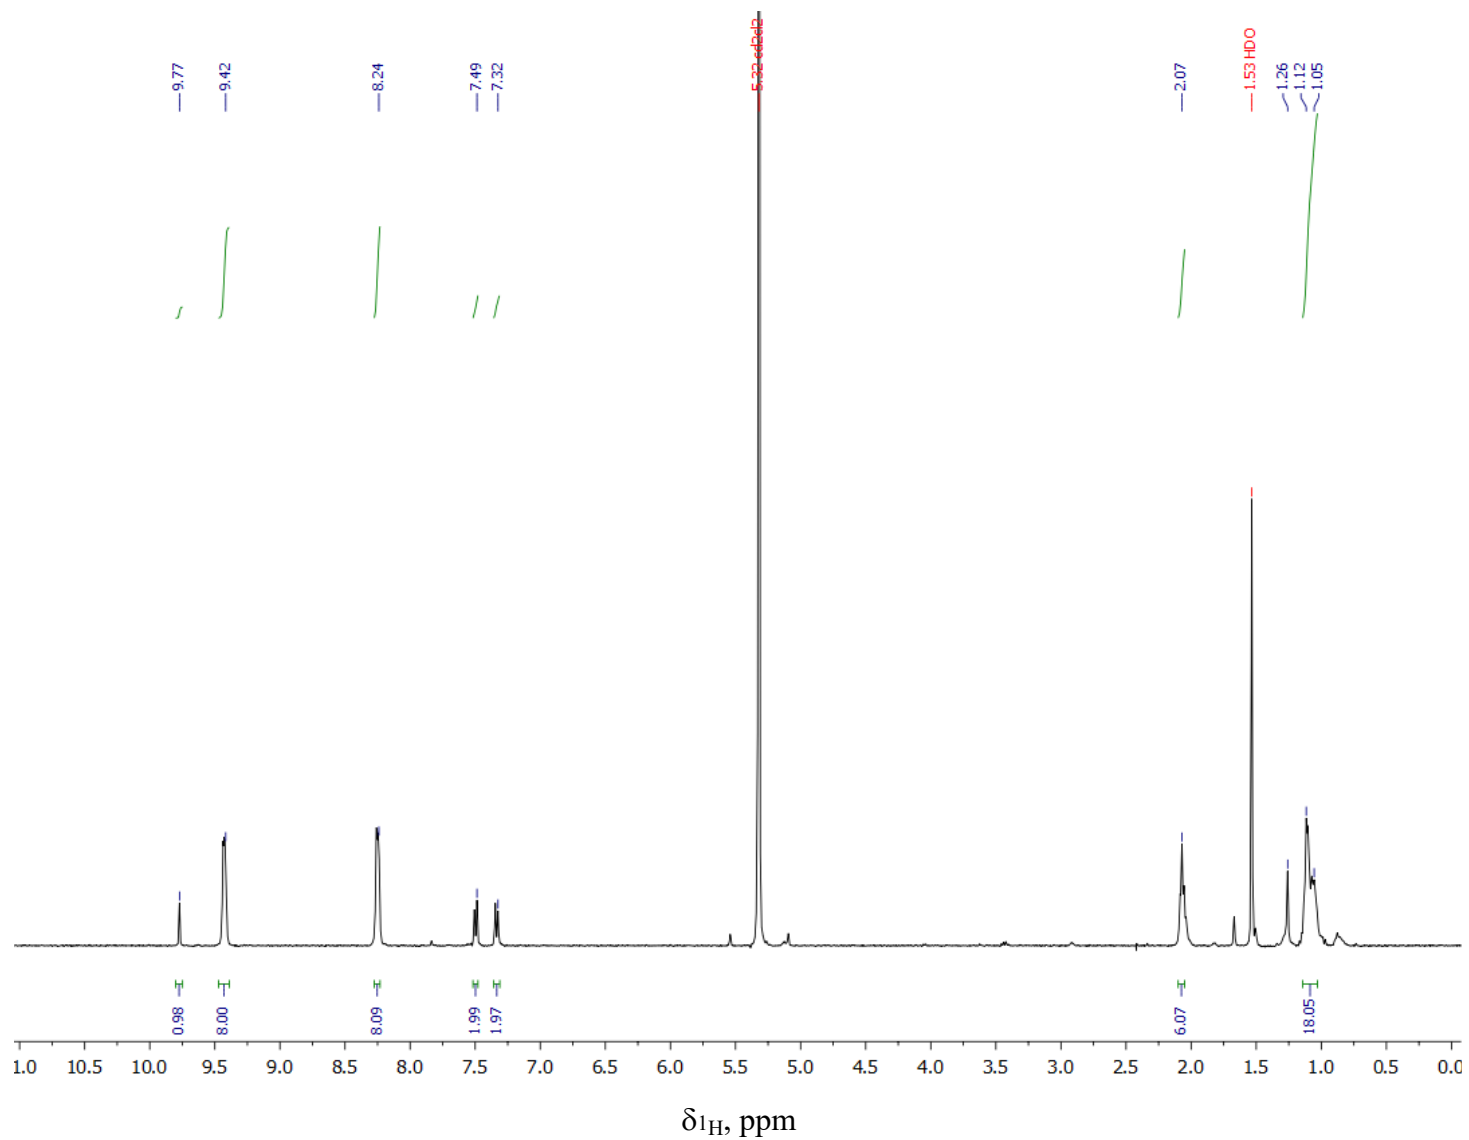

**Fig. S16.**  $^1\text{H}$  NMR spectrum of the phthalocyaninatoclathrochelate  $\text{FeN}_x\text{}_3(\text{B4-C}_6\text{H}_4\text{CHO})(\text{HfPc})$  in  $\text{CD}_2\text{Cl}_2$ .

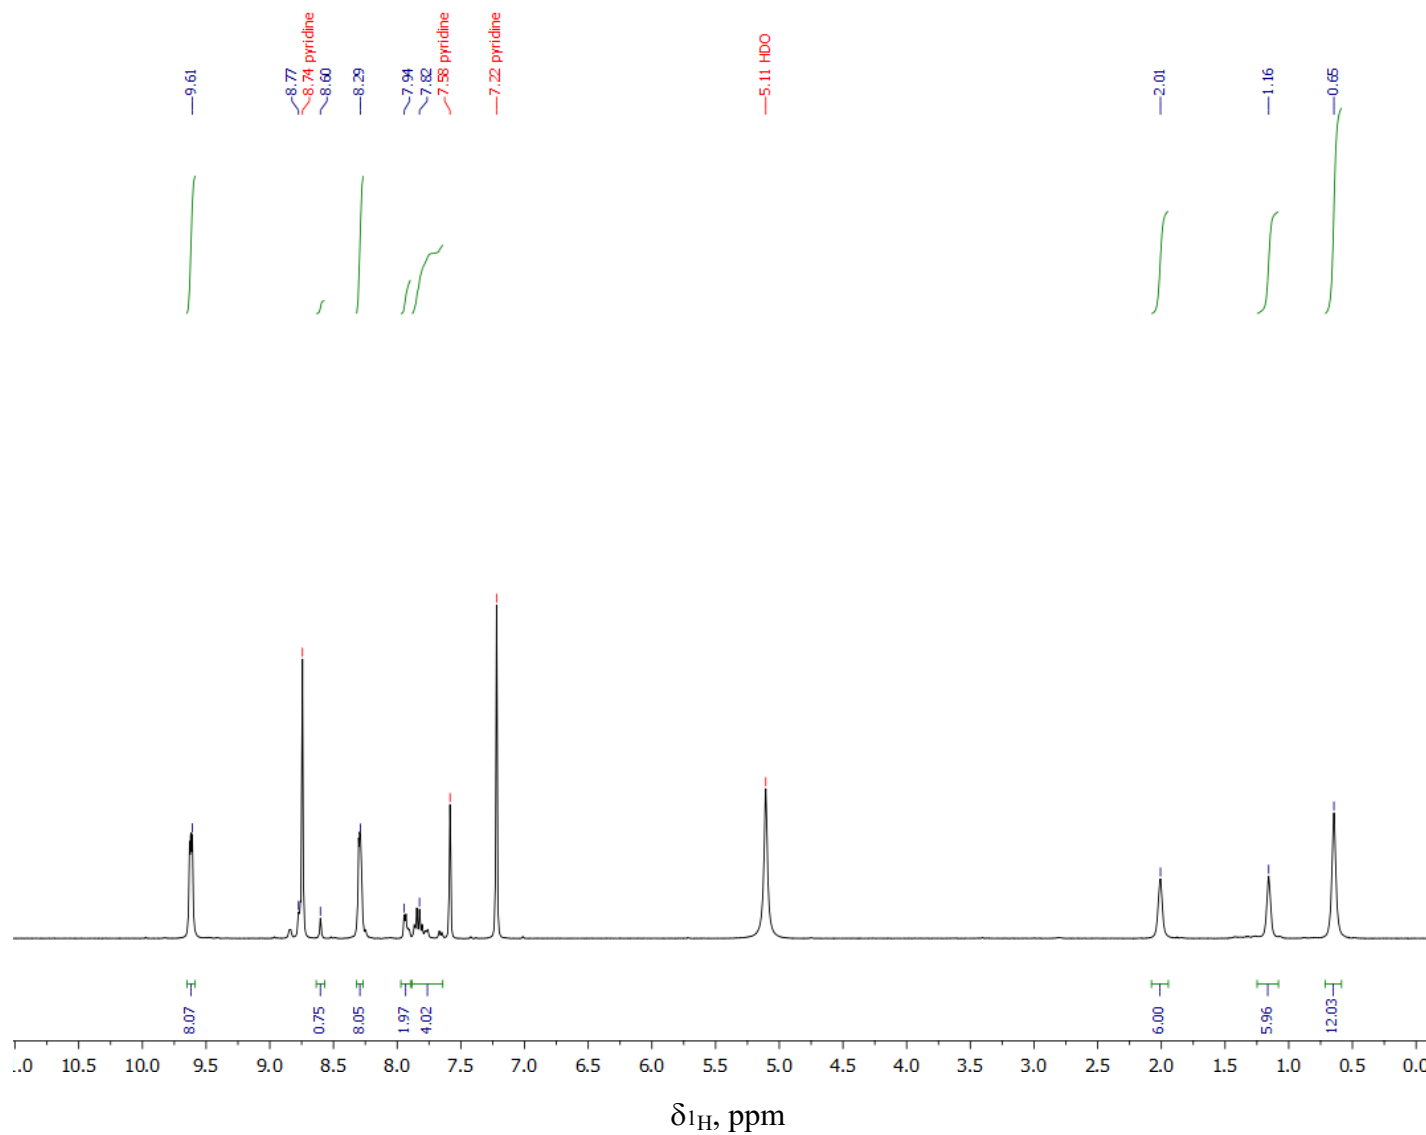

**Fig. S17.**  $^1\text{H}$  NMR spectrum of the hybrid phthalocyaninatoclathrochelate  $\text{FeN}_x\text{}_3(\text{B4-C}_6\text{H}_4\text{Id})(\text{ZrPc})$  in  $\text{pyridine-}d_5$ .

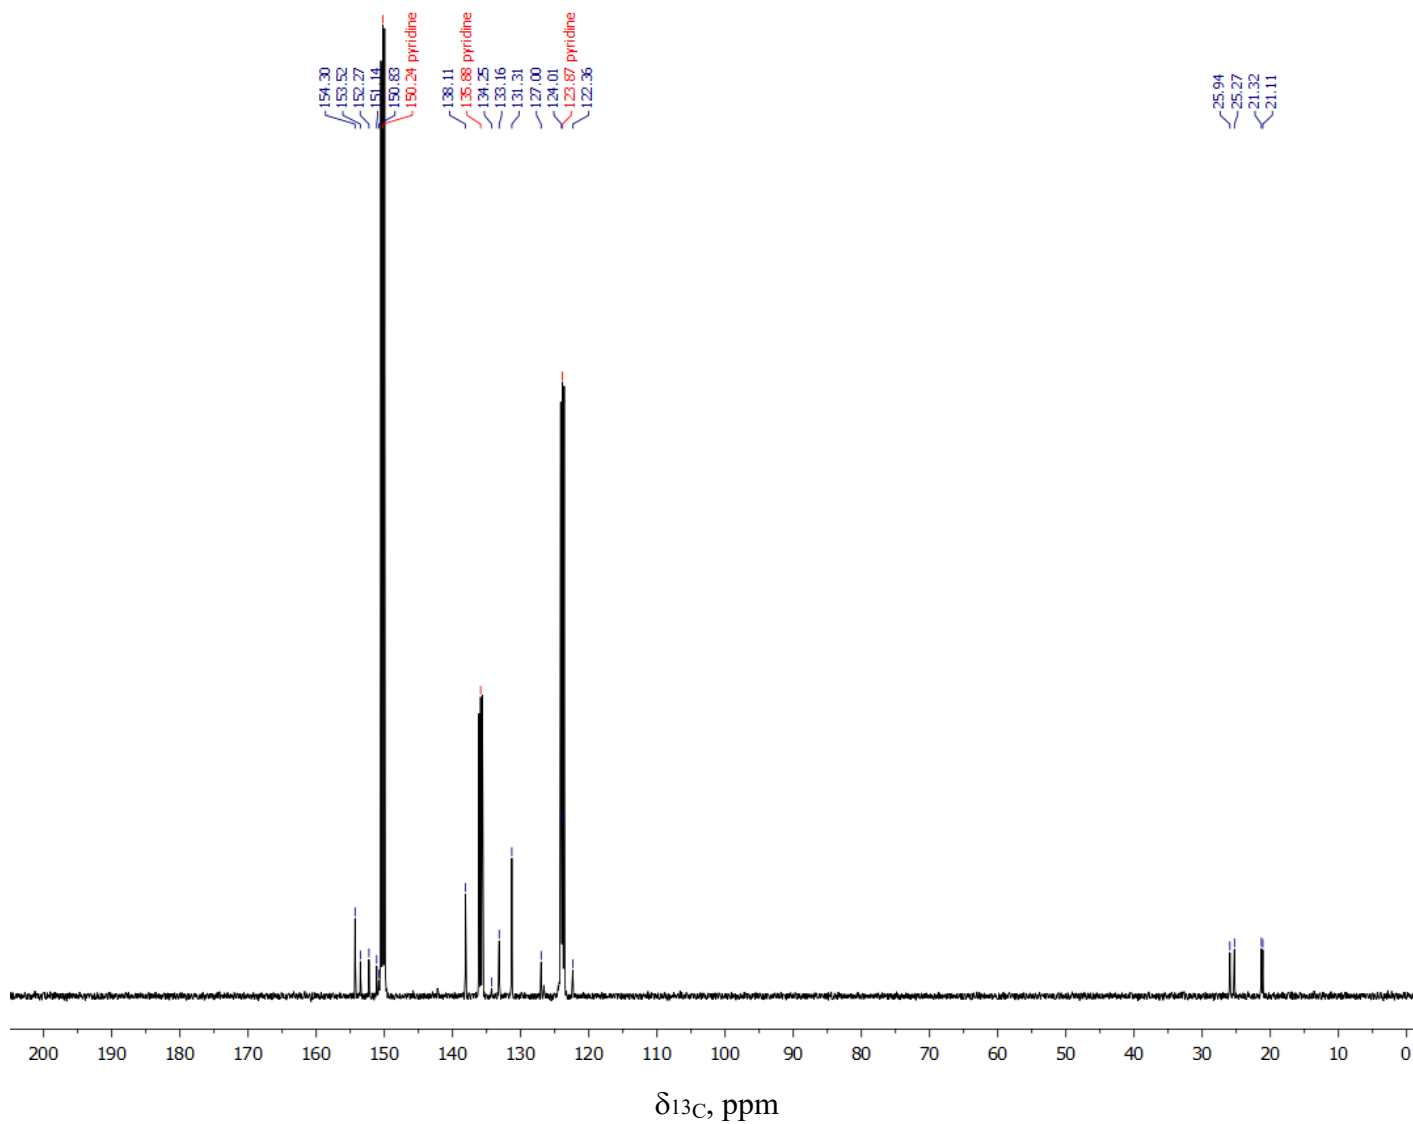

**Fig. S18.**  $^{13}\text{C}\{^1\text{H}\}$  NMR spectrum of the hybrid phthalocyaninatoclathrochelate  $\text{FeN}_x\text{}_3(\text{B4-C}_6\text{H}_4\text{Id})(\text{ZrPc})$  in pyridine- $d_5$ .

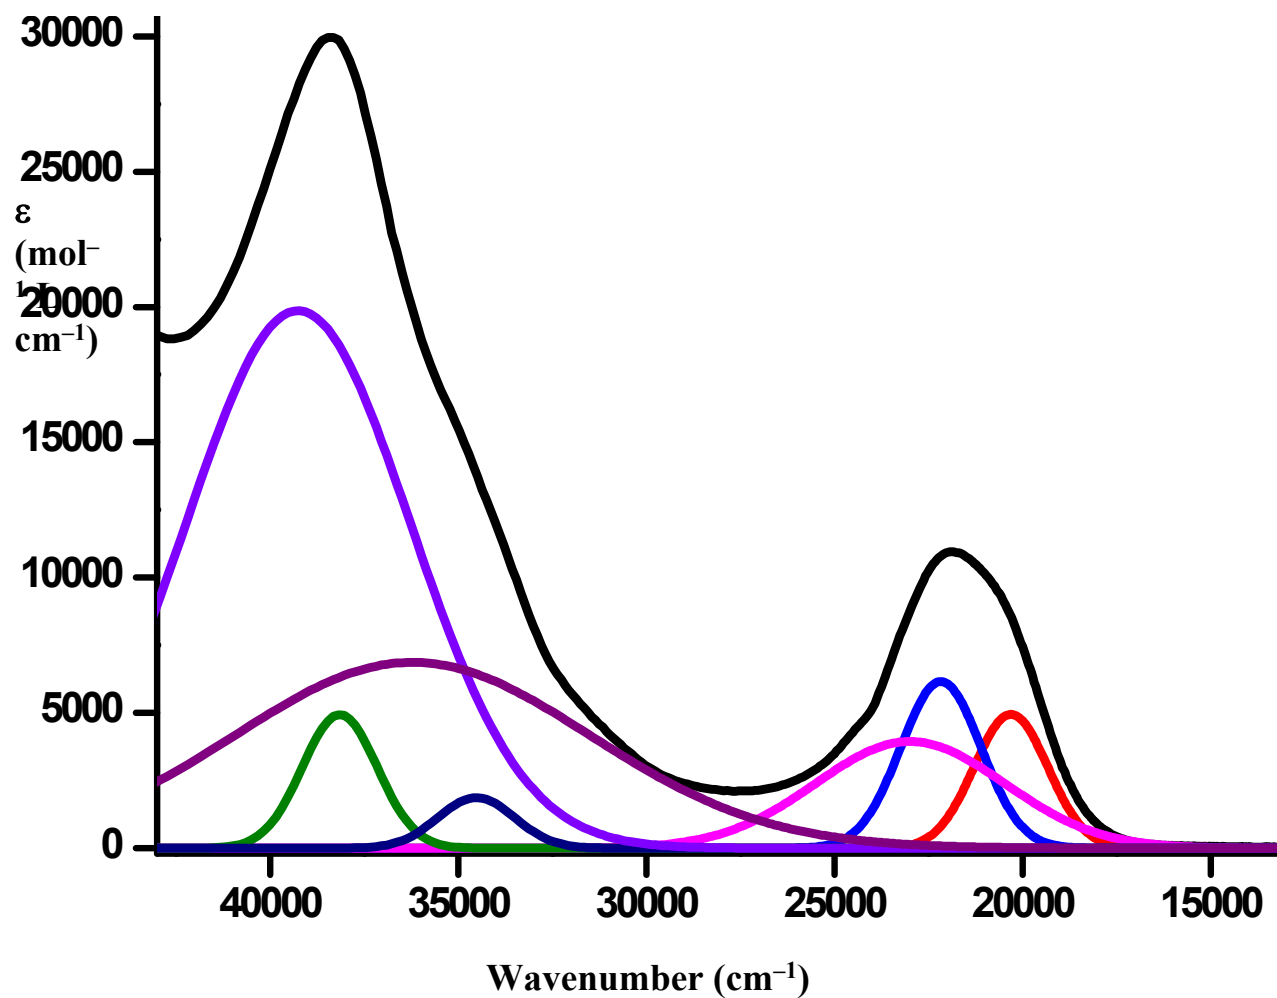

**Fig. S19.** Solution UV-vis spectrum of the semiclathrochelate  $\text{FeDm}(\text{HDm}_2)(\text{B4-C}_6\text{H}_4\text{CHO})$  in  $\text{CH}_2\text{Cl}_2$  (shown in black line) and its deconvolution into the Gaussian components (shown in color lines).

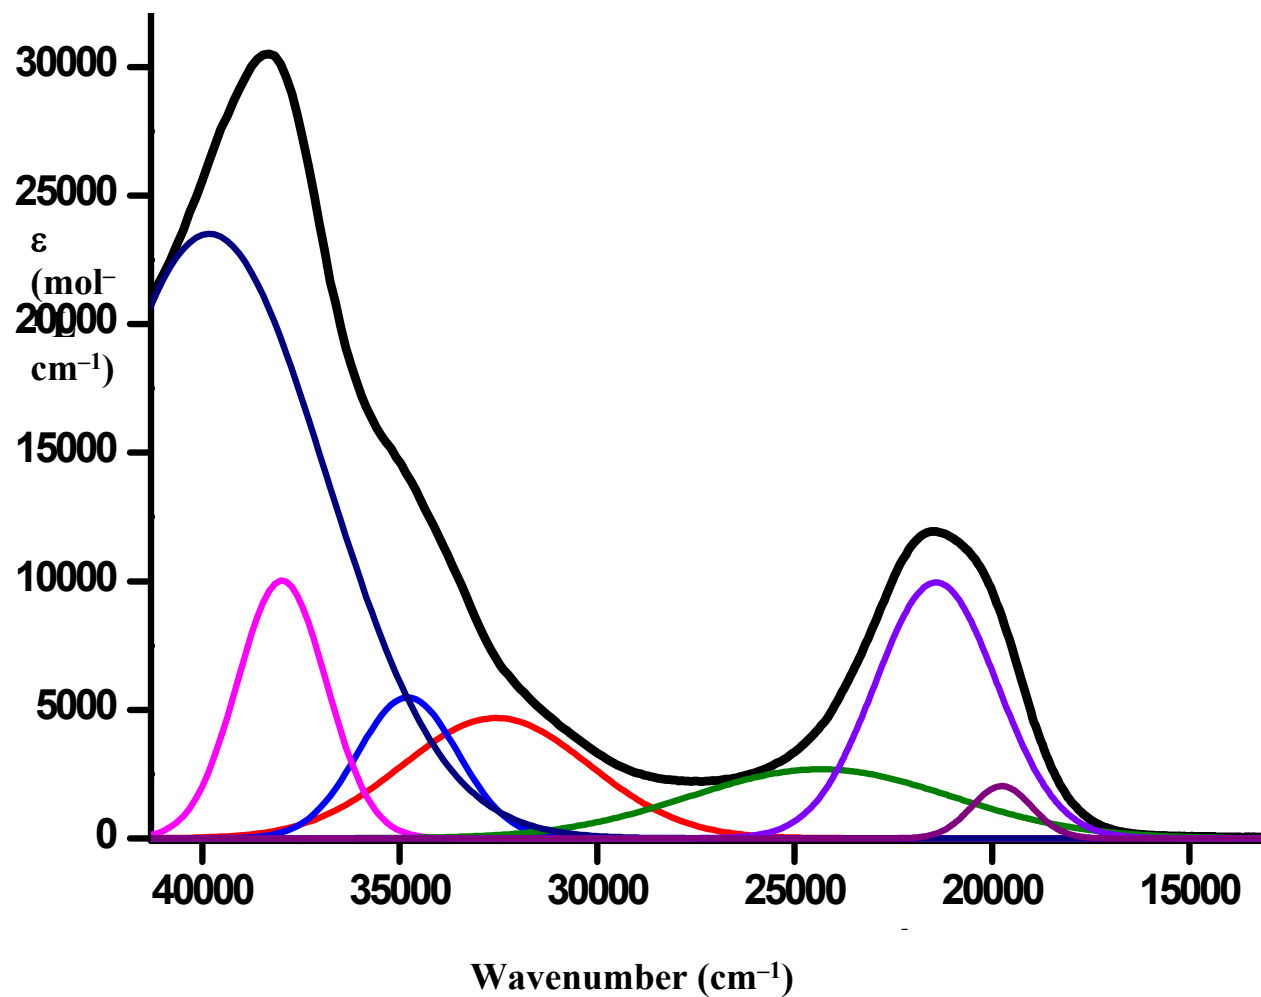

**Fig. S20.** Solution UV-vis spectrum of the semiclatrochelate  $\text{FeN}_x(\text{HN}_x)_2(\text{B4-C}_6\text{H}_4\text{CHO})$  in  $\text{CH}_2\text{Cl}_2$  (shown in black line) and its deconvolution into the Gaussian components (shown in color lines).

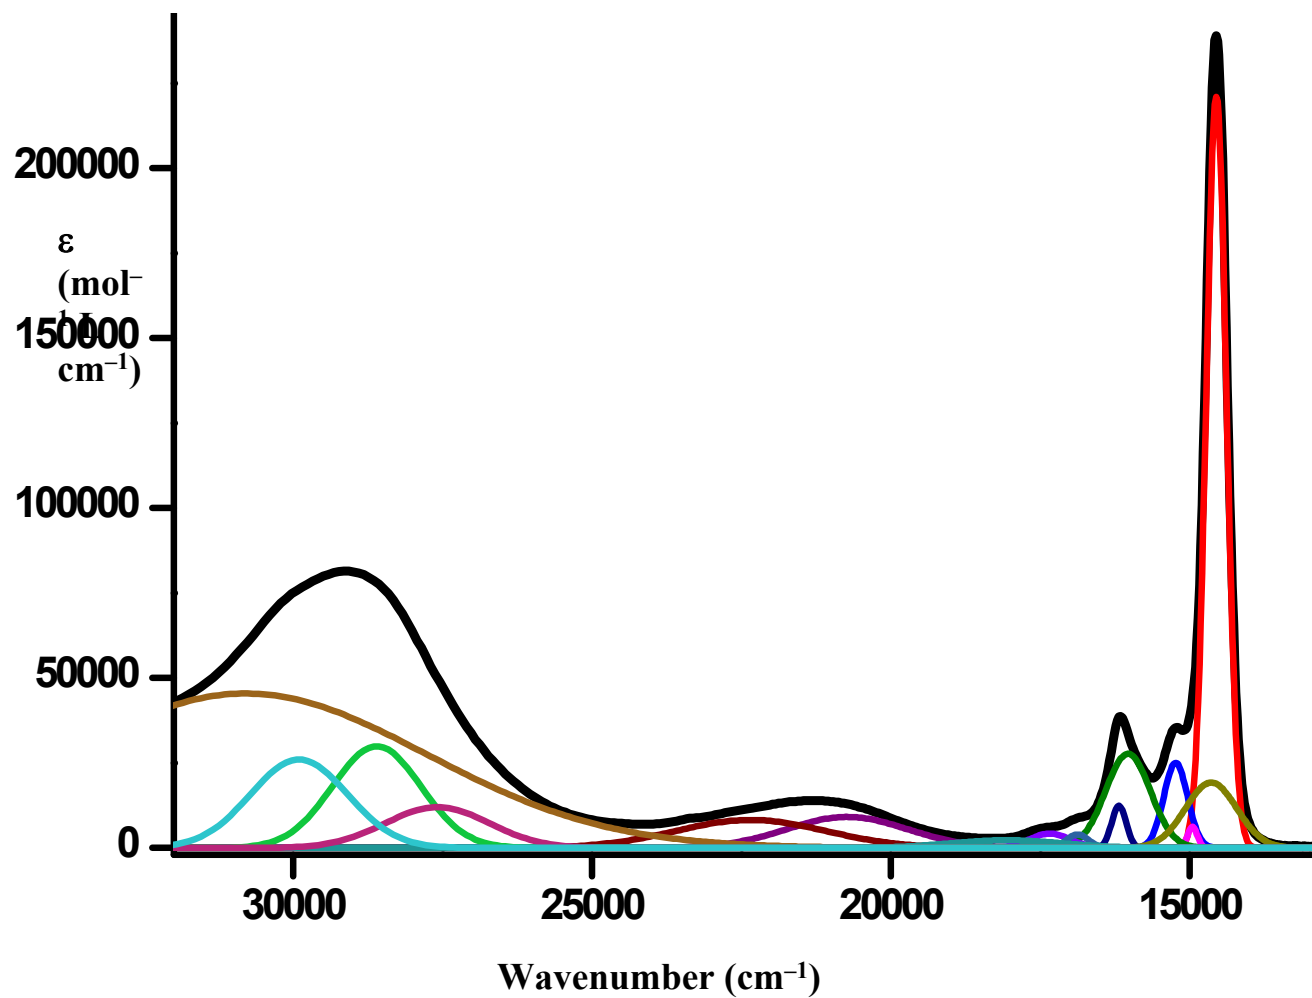

**Fig. S21.** Solution UV-vis spectrum of the phthalocyaninatoclathrochelate  $\text{FeDm}_3(\text{B4-C}_6\text{H}_4\text{CHO})(\text{ZrPc})$  in  $\text{CH}_2\text{Cl}_2$  (shown in black line) and its deconvolution into the Gaussian components (shown in color lines).

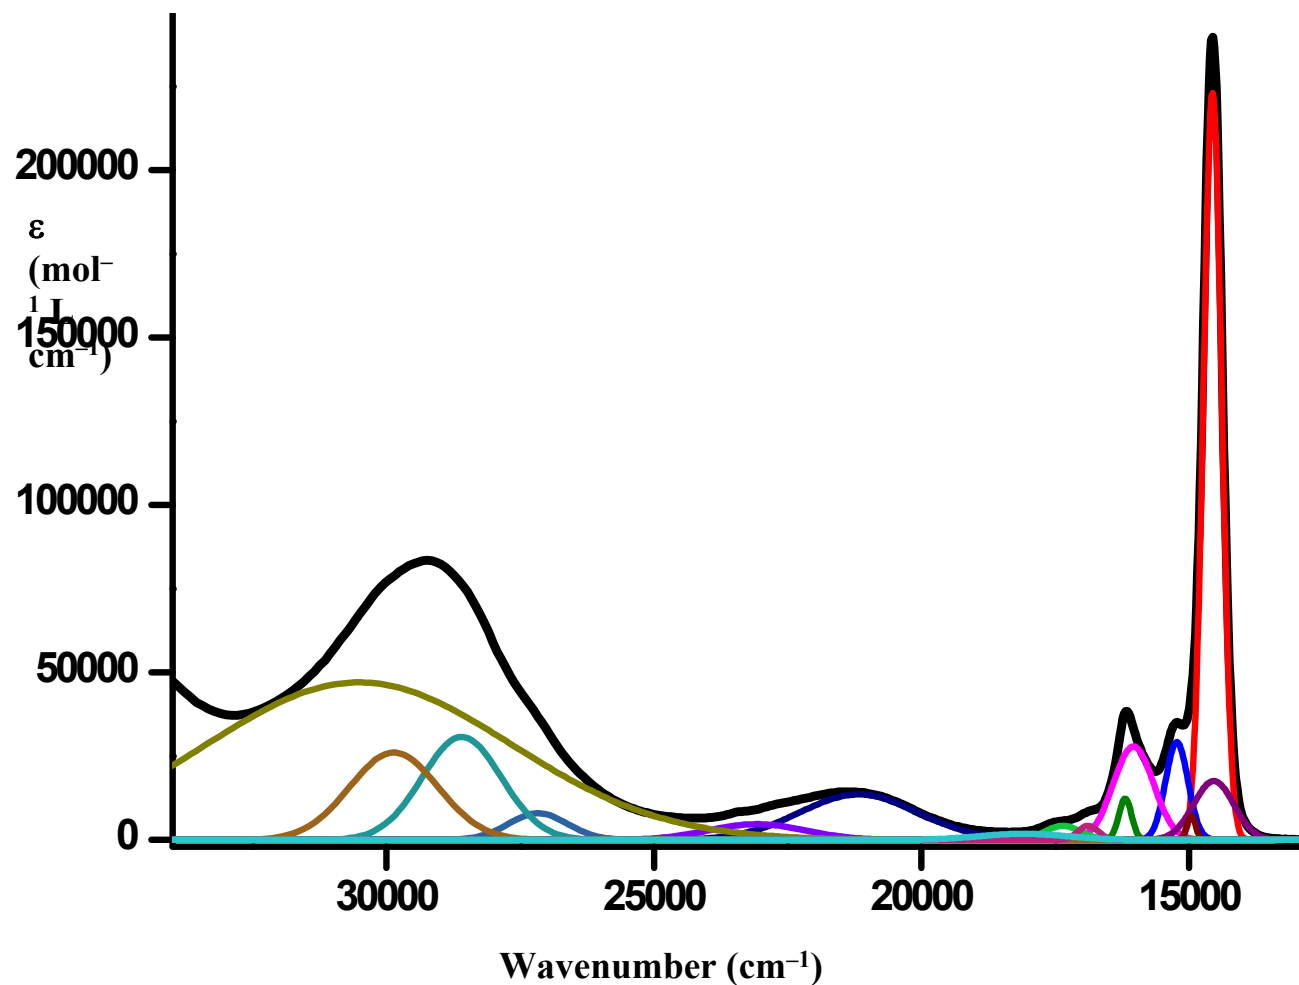

**Fig. S22.** Solution UV-vis spectrum of the phthalocyaninatoclathrochelate  $\text{FeDm}_3(\text{B4-C}_6\text{H}_4\text{CHO})(\text{HfPc})$  in  $\text{CH}_2\text{Cl}_2$  (shown in black line) and its deconvolution into the Gaussian components (shown in color lines).

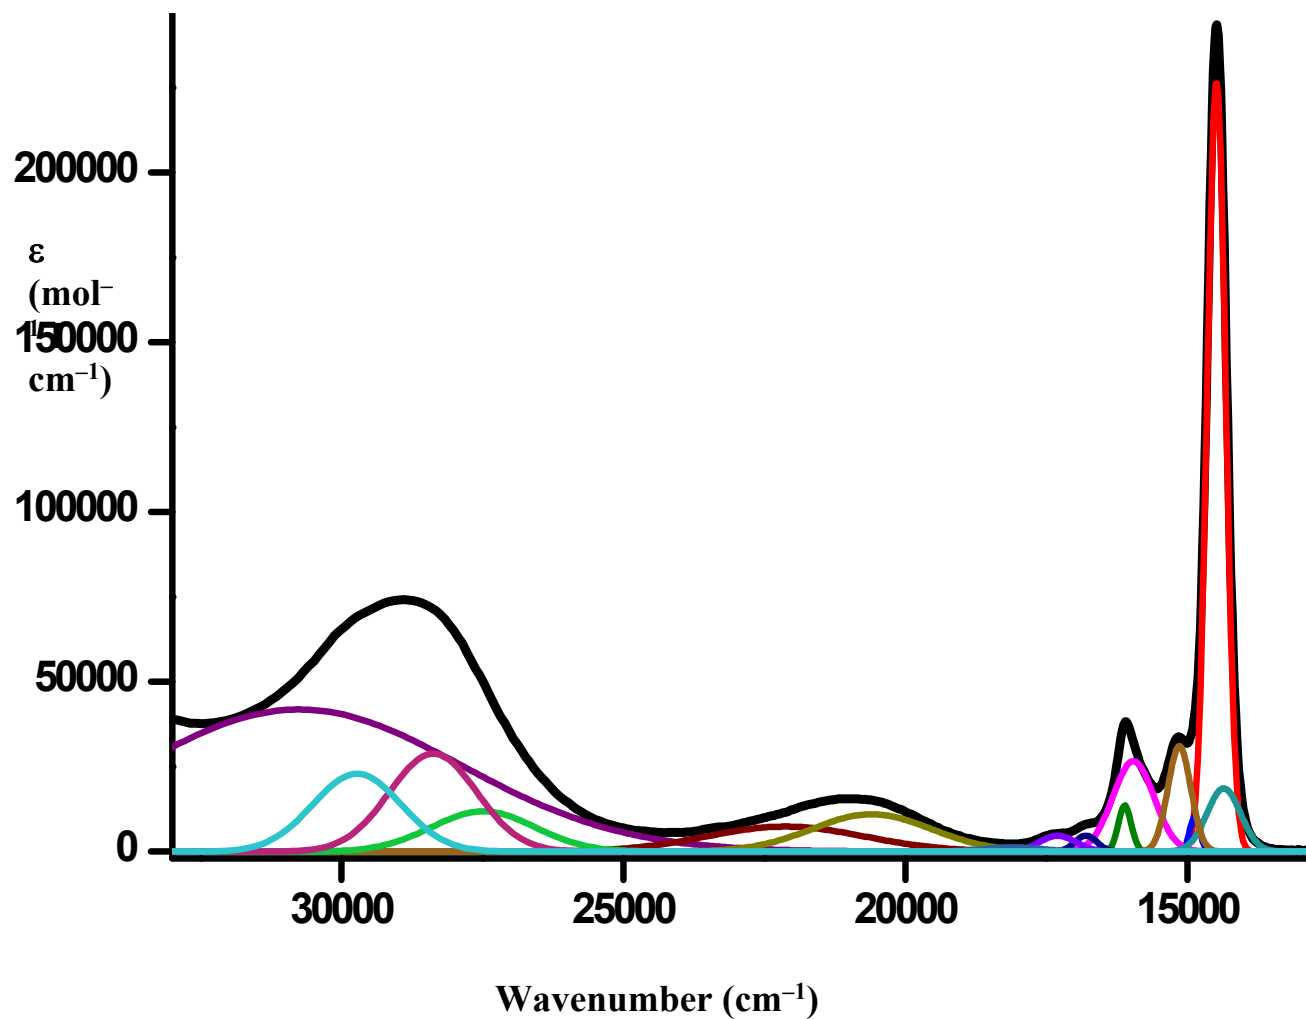

**Fig. S23.** Solution UV-vis spectrum of the phthalocyaninatoclathrochelate  $\text{FeN}_x\text{}_3(\text{B4-C}_6\text{H}_4\text{CHO})(\text{ZrPc})$  in 1,2-dichlorobenzene (shown in black line) and its deconvolution into the Gaussian components (shown in color lines).



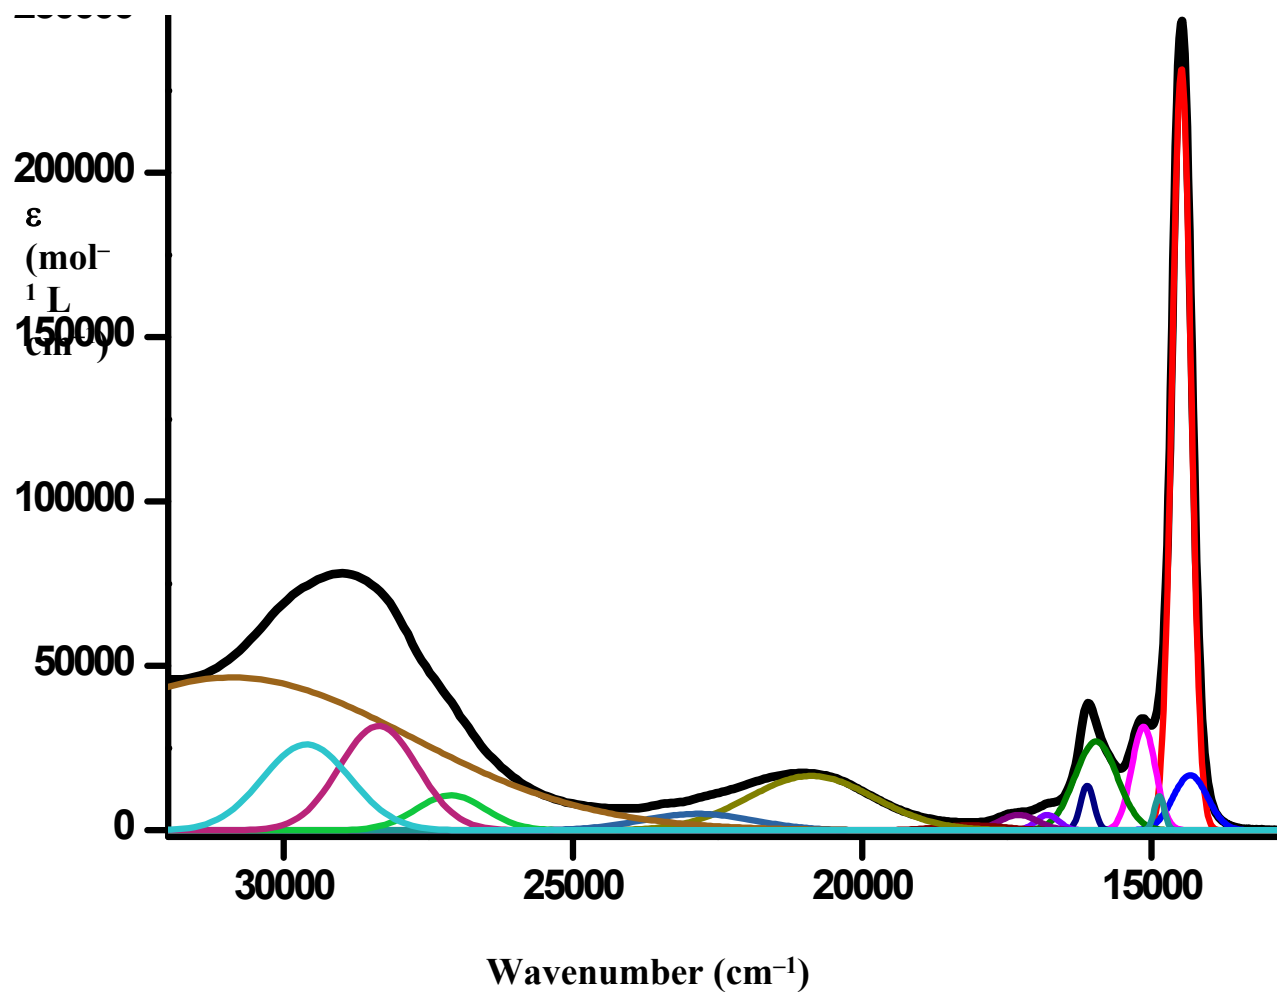

**Fig. S24.** Solution UV-vis spectrum of the phthalocyaninatoclathrochelate  $\text{FeN}_x\text{}_3(\text{B4-C}_6\text{H}_4\text{CHO})(\text{HfPc})$  in 1,2-dichlorobenzene (shown in black line) and its deconvolution into the Gaussian components (shown in color lines).

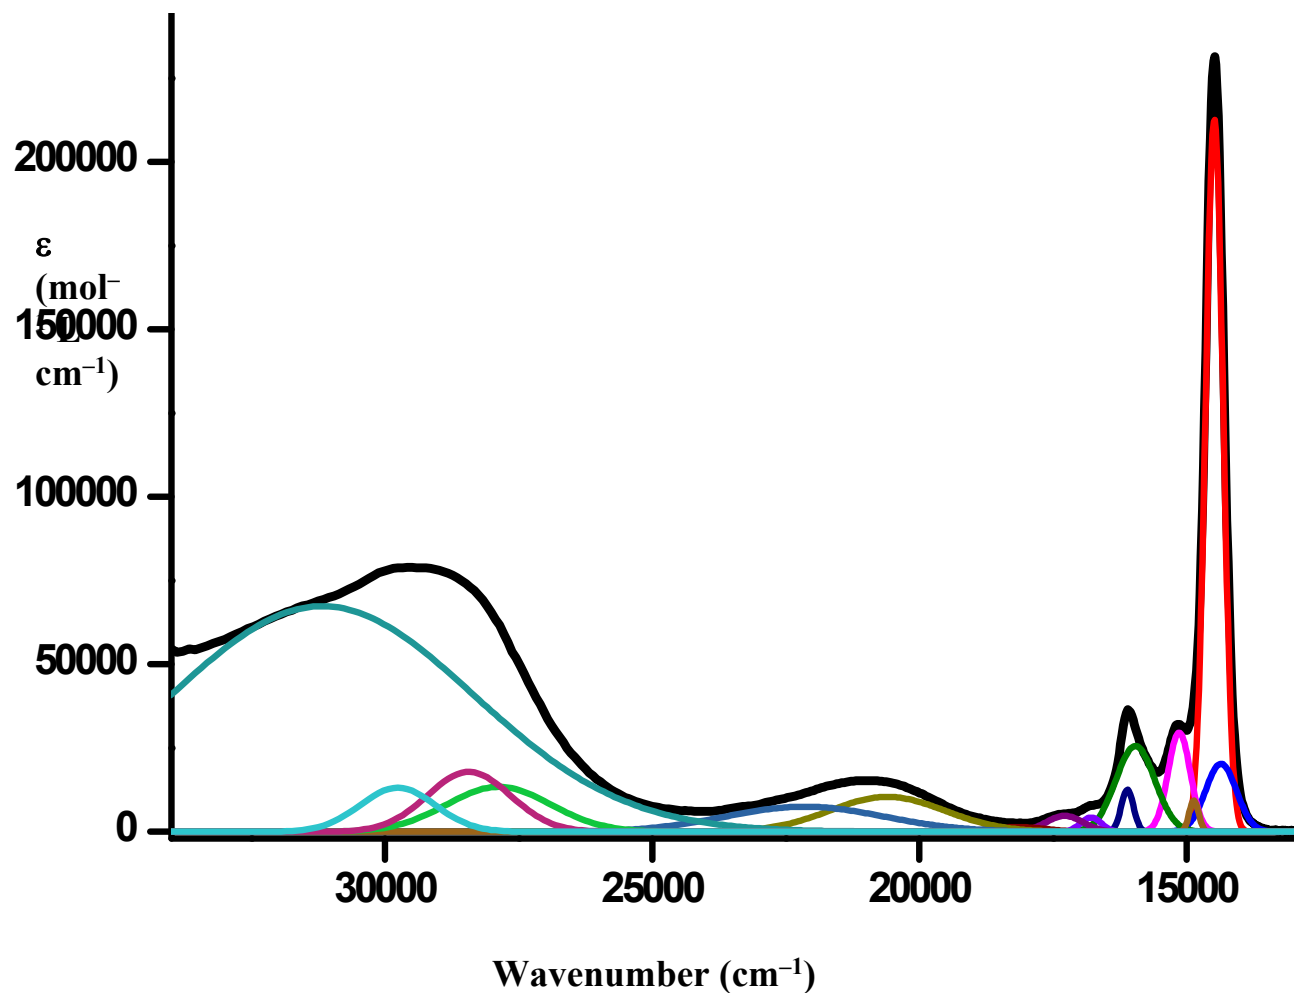

**Fig. S25.** Solution UV-vis spectrum of the hybrid phthalocyaninatoclathrochelate  $\text{FeN}_x\text{}_3(\text{B4-C}_6\text{H}_4\text{Id})(\text{ZrPc})$  in 1,2-dichlorobenzene (shown in black line) and its deconvolution into the Gaussian components (shown in color lines).

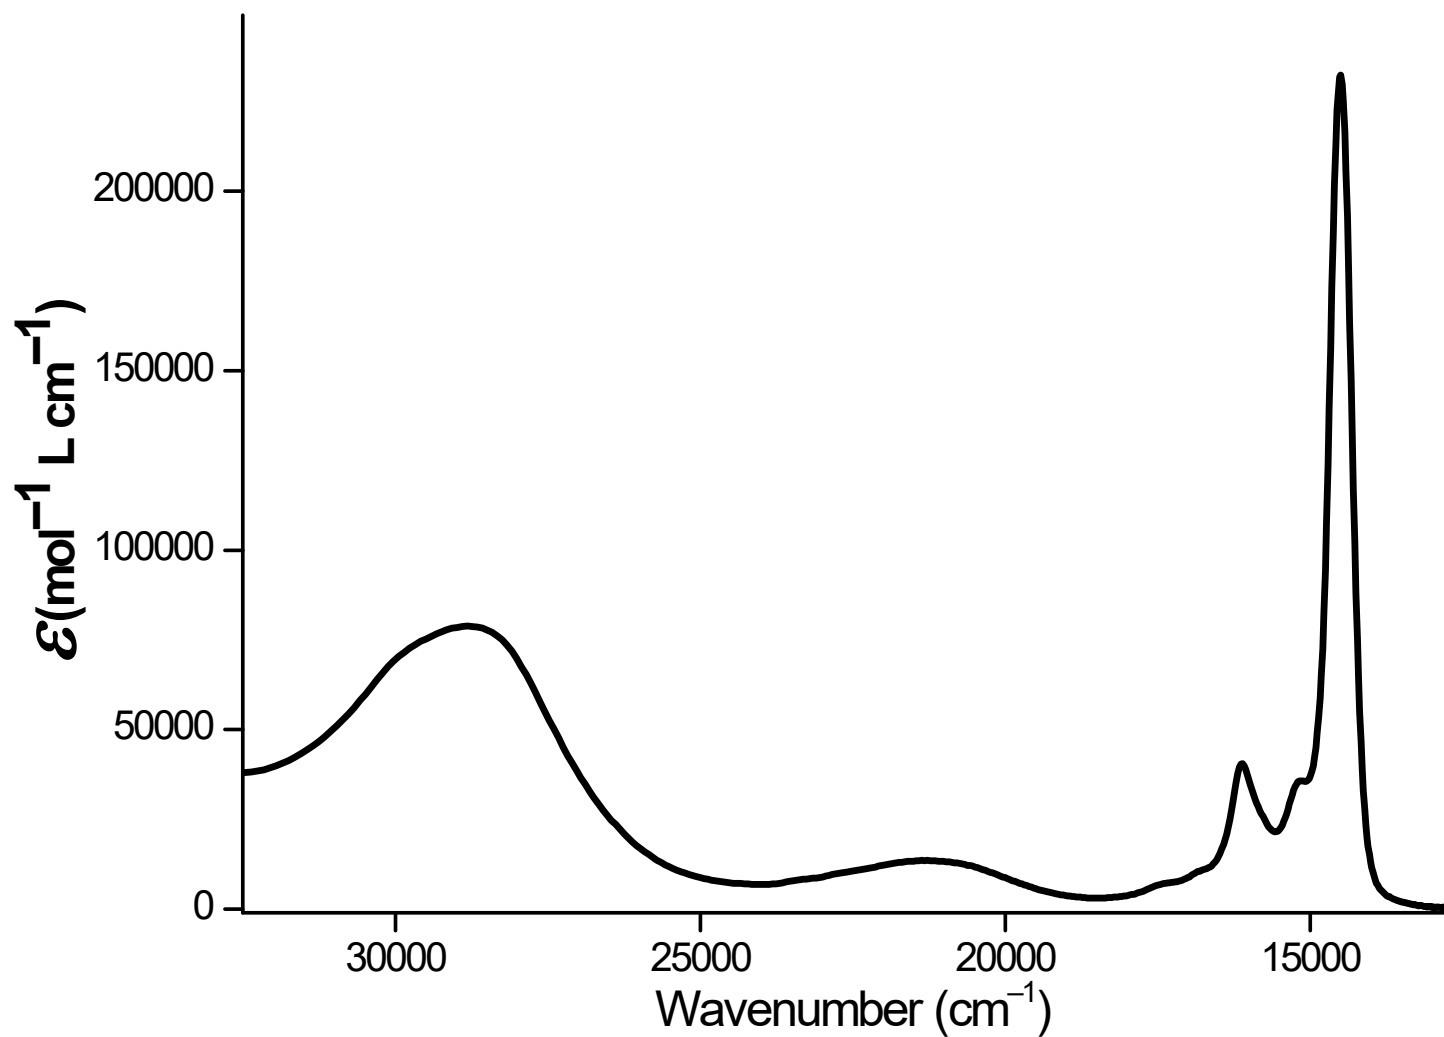

**Fig. S26.** Solution UV-vis spectrum of the hybrid phthalocyaninatoclathrochelate  $\text{FeDm}_3(\text{B4-C}_6\text{H}_4\text{CHO})(\text{ZrPc})$  in pyridine.

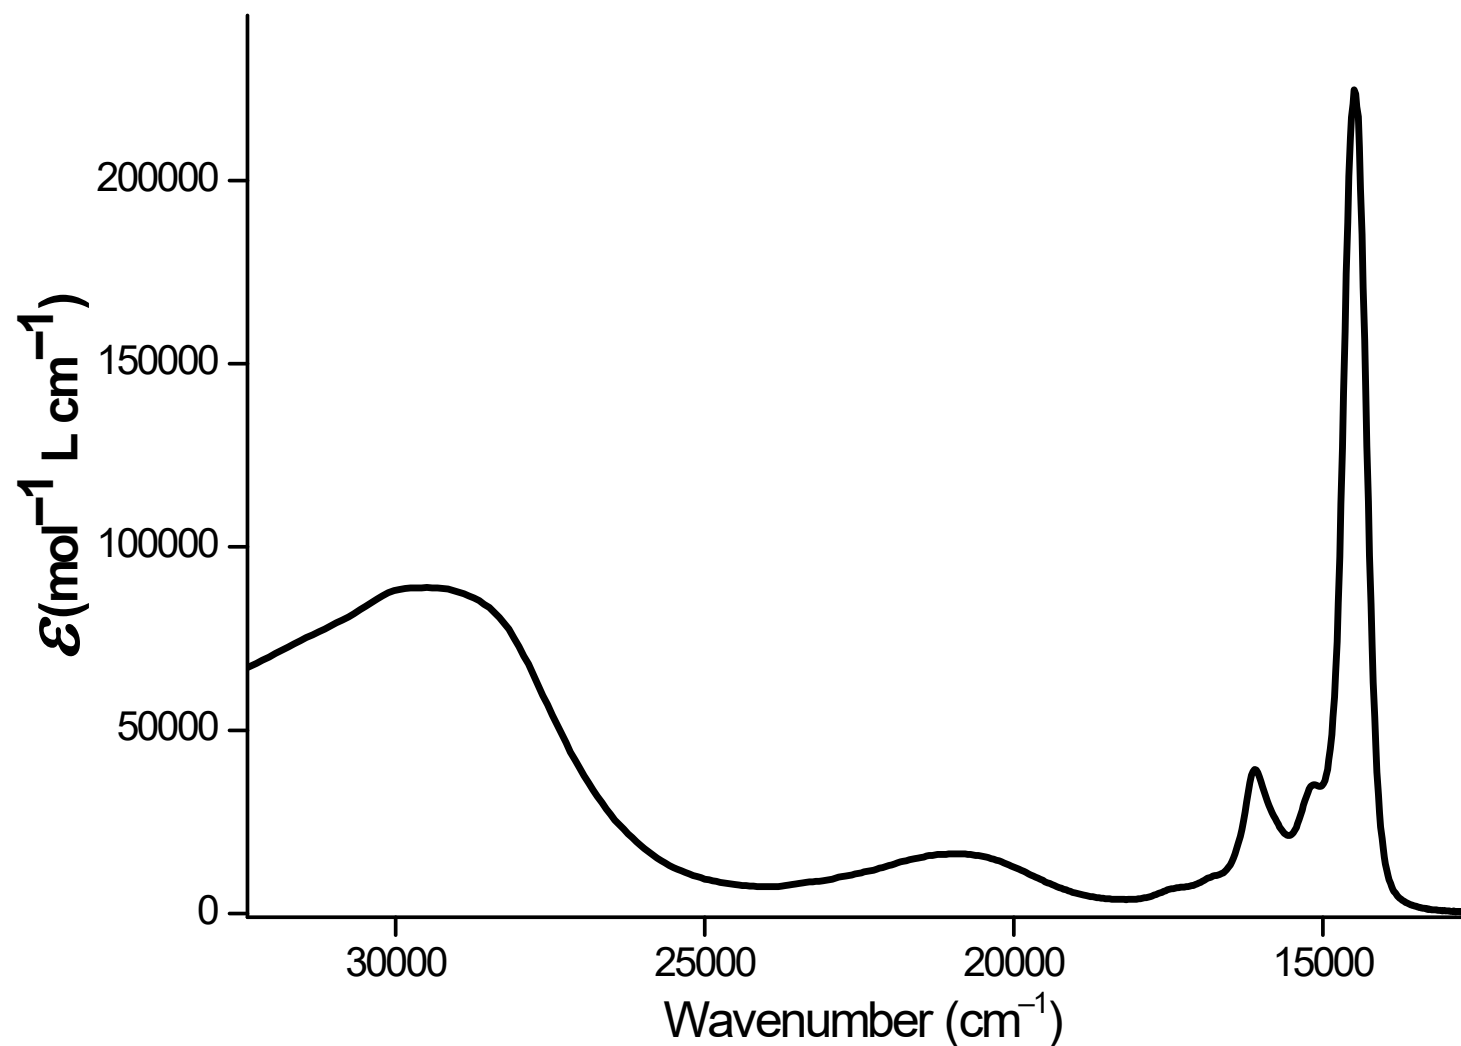

**Fig. S27.** Solution UV-vis spectrum of the hybrid phthalocyaninatoclathrochelate  $\text{FeN}_x\text{}_3(\text{B4-C}_6\text{H}_4\text{Id})(\text{ZrPc})$  in pyridine.

**Table S1.** Solution UV-vis spectra ( $\nu$ ,  $\text{cm}^{-1}$ ,  $\epsilon \times 10^{-3}$ ,  $\text{mol}^{-1}\text{Lcm}^{-1}$ ) of the hybrid iron(II) phthalocyaninoclathrochelates under study.

| Compound                                                       | $\nu_1$        | $\nu_2$        | $\nu_3$        | $\nu_4$       | $\nu_5$       | $\nu_6$       | $\nu_7$        | $\nu_8$        | $\nu_9$        | $\nu_{10}$     | $\nu_{11}$     | $\nu_{12}$     | $\nu_{13}$    | $\nu_{14}$    | $\nu_{15}$    |
|----------------------------------------------------------------|----------------|----------------|----------------|---------------|---------------|---------------|----------------|----------------|----------------|----------------|----------------|----------------|---------------|---------------|---------------|
| FeDm <sub>3</sub> (B4-C <sub>6</sub> H <sub>4</sub> CHO)(ZrPc) | 14553<br>(221) | 14640<br>(19)  | 14954<br>(6.2) | 15234<br>(25) | 16032<br>(28) | 16185<br>(13) | 16878<br>(4.0) | 17336<br>(4.2) | 18064<br>(2.3) | 20734<br>(9.1) | 22346<br>(8.2) | 27591<br>(12)  | 28605<br>(30) | 29904<br>(26) | 30793<br>(45) |
| FeDm <sub>3</sub> (B4-C <sub>6</sub> H <sub>4</sub> CHO)(HfPc) | 14537<br>(18)  | 14559<br>(223) | 14957<br>(7.1) | 15227<br>(29) | 16038<br>(28) | 16192<br>(12) | 16886<br>(4.2) | 17358<br>(4.2) | 18103<br>(1.9) | 21170<br>(14)  | 23077<br>(4.7) | 27169<br>(8.0) | 28594<br>(31) | 29864<br>(26) | 30518<br>(47) |
| FeNx <sub>3</sub> (B4-C <sub>6</sub> H <sub>4</sub> CHO)(ZrPc) | 14353<br>(19)  | 14482<br>(227) | 14864<br>(10)  | 15140<br>(31) | 15956<br>(27) | 16109<br>(14) | 16797<br>(4.7) | 17299<br>(4.7) | 18093<br>(1.3) | 20599<br>(11)  | 22128<br>(7.4) | 27487<br>(12)  | 28375<br>(29) | 29726<br>(23) | 30749<br>(42) |
| FeNx <sub>3</sub> (B4-C <sub>6</sub> H <sub>4</sub> CHO)(HfPc) | 14329<br>(17)  | 14481<br>(232) | 14865<br>(11)  | 15139<br>(32) | 15959<br>(27) | 16112<br>(14) | 16799<br>(4.7) | 17294<br>(4.7) | 18123<br>(1.5) | 20883<br>(17)  | 22846<br>(5.0) | 27111<br>(11)  | 28364<br>(32) | 29609<br>(26) | 30899<br>(47) |
| FeNx <sub>3</sub> (B4-C <sub>6</sub> H <sub>4</sub> Id)(ZrPc)  | 14355<br>(20)  | 14480<br>(213) | 14862<br>(9.4) | 15137<br>(30) | 15958<br>(26) | 16108<br>(13) | 16789<br>(4.2) | 17283<br>(4.8) | 18146<br>(1.4) | 20602<br>(10)  | 22149<br>(7.5) | 27872<br>(13)  | 28432<br>(18) | 29766<br>(13) | 31176<br>(67) |

**Table S2.** Solution UV-vis spectra ( $\nu$ ,  $\text{cm}^{-1}$ ,  $\epsilon \times 10^{-3}$ ,  $\text{mol}^{-1} \cdot \text{l} \cdot \text{cm}^{-1}$ ) of the (semi)clathrochelate iron(II) complexes

| Compound                                                         | $\nu_1$        | $\nu_2$        | $\nu_3$        | $\nu_4$        | $\nu_5$        | $\nu_6$        | $\nu_7$       |
|------------------------------------------------------------------|----------------|----------------|----------------|----------------|----------------|----------------|---------------|
| $\text{FeN}_x_3(\text{B4-C}_6\text{H}_4\text{CHO})_2$            |                | 22162<br>(6.8) | 23941<br>(2.8) | 31601<br>(12)  | 33284<br>(27)  | 38309<br>(12)  |               |
| $\text{FeN}_x(\text{HN}_x)_2(\text{B4-C}_6\text{H}_4\text{CHO})$ | 19757<br>(2.0) | 21417<br>(10)  | 24343<br>(2.7) | 32560<br>(4.7) | 34796<br>(5.5) | 37986<br>(10)  | 39823<br>(24) |
| $\text{FeDm}(\text{HDm}_2)(\text{B4-C}_6\text{H}_4\text{CHO})$   | 20306<br>(4.9) | 22168<br>(6.2) | 22986<br>(3.9) | 34516<br>(1.9) | 36214<br>(6.9) | 38144<br>(4.9) | 39251<br>(20) |

**Table S3.** Crystallographic data and experimental details for the obtained iron(II) phthalocyaninoclathrochelates and their semiclathrochelate precursor

| Parameter                                                                        | FeNx(HNx <sub>2</sub> )(B4-C <sub>6</sub> H <sub>4</sub> CHO)    | FeNx <sub>3</sub> (B4-C <sub>6</sub> H <sub>4</sub> C(OCH <sub>3</sub> ) <sub>2</sub> )(HfPc) · 1.5C <sub>6</sub> H <sub>6</sub> | FeNx <sub>3</sub> (B4-C <sub>6</sub> H <sub>4</sub> CHO)(ZrPc) · 3.5CHCl <sub>3</sub>       | FeNx <sub>3</sub> (B4-C <sub>6</sub> H <sub>4</sub> Id)(ZrPc)        |
|----------------------------------------------------------------------------------|------------------------------------------------------------------|----------------------------------------------------------------------------------------------------------------------------------|---------------------------------------------------------------------------------------------|----------------------------------------------------------------------|
| Empirical formula                                                                | C <sub>25</sub> H <sub>31</sub> BFeN <sub>6</sub> O <sub>7</sub> | C <sub>68</sub> H <sub>60</sub> BFeHfN <sub>14</sub> O <sub>8</sub>                                                              | C <sub>60.5</sub> H <sub>48.5</sub> BCl <sub>10.5</sub> FeN <sub>14</sub> O <sub>7</sub> Zr | C <sub>63</sub> H <sub>50</sub> BFeN <sub>17</sub> O <sub>7</sub> Zr |
| Formula weight                                                                   | 594.22                                                           | 1446.45                                                                                                                          | 1613.74                                                                                     | 1315.08                                                              |
| Color, habit                                                                     | Dark red, plate                                                  | Bronze, prism                                                                                                                    | Red, plate                                                                                  | Violet, prism                                                        |
| Crystal size (mm)                                                                | 0.53 × 0.47 × 0.08                                               | 0.36 × 0.11 × 0.10                                                                                                               | 0.25 × 0.19 × 0.03                                                                          | 0.16 × 0.14 × 0.09                                                   |
| <i>a</i> (Å)                                                                     | 10.5430(6)                                                       | 11.8206(2)                                                                                                                       | 13.398(3)                                                                                   | 21.989(3)                                                            |
| <i>b</i> (Å)                                                                     | 18.7340(14)                                                      | 12.7249(3)                                                                                                                       | 15.250(3)                                                                                   | 12.810(2)                                                            |
| <i>c</i> (Å)                                                                     | 13.9340(9)                                                       | 23.8173(5)                                                                                                                       | 17.404(4)                                                                                   | 29.843(6)                                                            |
| <i>α</i> (°)                                                                     | 90                                                               | 101.295(1)                                                                                                                       | 111.16(3)                                                                                   | 90                                                                   |
| <i>β</i> (°)                                                                     | 109.458(2)                                                       | 103.735(1)                                                                                                                       | 94.87(3)                                                                                    | 103.223(6)                                                           |
| <i>γ</i> (°)                                                                     | 90                                                               | 95.341(1)                                                                                                                        | 92.81(3)                                                                                    | 90                                                                   |
| <i>V</i> (Å <sup>3</sup> )                                                       | 2595.0(3)                                                        | 3375.82(12)                                                                                                                      | 3292.2(13)                                                                                  | 8183(2)                                                              |
| Crystal system                                                                   | Monoclinic                                                       | Triclinic                                                                                                                        | Triclinic                                                                                   | Monoclinic                                                           |
| Space group, <i>Z</i>                                                            | P2 <sub>1</sub> /c, 4                                            | P -1, 2                                                                                                                          | P -1, 2                                                                                     | P 2 <sub>1</sub> /c, 4                                               |
| <i>D</i> <sub>cal</sub> (g cm <sup>-3</sup> )                                    | 1.521                                                            | 1.423                                                                                                                            | 1.628                                                                                       | 1.067                                                                |
| <i>μ</i> (mm <sup>-1</sup> )                                                     | 0.639                                                            | 5.039                                                                                                                            | 1.040                                                                                       | 0.356                                                                |
| Reflections collected                                                            | 36898                                                            | 53357                                                                                                                            | 45507                                                                                       | 100915                                                               |
| Independent reflections ( <i>R</i> <sub>int</sub> )                              | 6409 (0.123)                                                     | 12875 (0.033)                                                                                                                    | 14133 (0.061)                                                                               | 25163 (0.171)                                                        |
| Obs.refl./restraints/ parameters                                                 | 3280 / 0 / 349                                                   | 12314 / 24 / 807                                                                                                                 | 11559 / 7 / 878                                                                             | 7442 / 0 / 796                                                       |
| <i>R</i> , <sup>a</sup> % [ <i>F</i> <sup>2</sup> > 2σ( <i>F</i> <sup>2</sup> )] | 0.057                                                            | 0.044                                                                                                                            | 0.081                                                                                       | 0.074                                                                |
| <i>R</i> <sub>w</sub> , <sup>b</sup> % ( <i>F</i> <sup>2</sup> )                 | 0.132                                                            | 0.122                                                                                                                            | 0.174                                                                                       | 0.116                                                                |
| <i>GOF</i>                                                                       | 1.022                                                            | 1.117                                                                                                                            | 1.013                                                                                       | 0.942                                                                |
| F(000)                                                                           | 1240                                                             | 1466                                                                                                                             | 1630                                                                                        | 2696                                                                 |

$${}^a R = \Sigma | |F_o| - |F_c| | / \Sigma |F_o|, {}^b R_w = [\Sigma(w(F_o^2 - F_c^2)^2) / \Sigma(w(F_o^2))]^{1/2}, {}^c \text{GOF} = [\Sigma w(F_o^2 - F_c^2)^2 / (N_{\text{obs}} - N_{\text{param}})]^{1/2}$$
